# Supplementary material for: Screening, diagnosis and care cascade for viral hepatitis B and C in Yaoundé, Cameroon: a qualitative study of patients and health providers coping with uncertainty and unbearable costs
Source: PubMed Central journal article supplement — BMJ Open. 2019 Mar 20;9(3):e025415. doi: 10.1136/bmjopen-2018-025415 (PMC6475147; doi:10.1136/bmjopen-2018-025415), 2019-03-20
Supplement: bmjopen-2018-025415.draft_revisions.pdf [file bmjopen-2018-025415.draft_revisions.pdf]

# BMJ Open

BMJ Open is committed to open peer review. As part of this commitment we make the peer review history of every article we publish publicly available.

When an article is published we post the peer reviewers' comments and the authors' responses online. We also post the versions of the paper that were used during peer review. These are the versions that the peer review comments apply to.

The versions of the paper that follow are the versions that were submitted during the peer review process. They are not the versions of record or the final published versions. They should not be cited or distributed as the published version of this manuscript.

BMJ Open is an open access journal and the full, final, typeset and author-corrected version of record of the manuscript is available on our site with no access controls, subscription charges or pay-per-view fees (<http://bmjopen.bmj.com>).

If you have any questions on BMJ Open's open peer review process please email [info.bmjopen@bmj.com](mailto:info.bmjopen@bmj.com)

# BMJ Open

## Screening for viral hepatitis B and C in Yaoundé, Cameroon: coping with uncertainty and unbearable costs

|                               |                                                                                                                                                                                                                                                                                                                                                                                                                                                                      |
|-------------------------------|----------------------------------------------------------------------------------------------------------------------------------------------------------------------------------------------------------------------------------------------------------------------------------------------------------------------------------------------------------------------------------------------------------------------------------------------------------------------|
| Journal:                      | <i>BMJ Open</i>                                                                                                                                                                                                                                                                                                                                                                                                                                                      |
| Manuscript ID                 | bmjopen-2018-025415                                                                                                                                                                                                                                                                                                                                                                                                                                                  |
| Article Type:                 | Research                                                                                                                                                                                                                                                                                                                                                                                                                                                             |
| Date Submitted by the Author: | 21-Jul-2018                                                                                                                                                                                                                                                                                                                                                                                                                                                          |
| Complete List of Authors:     | Chabrol, Fanny; French Institute for Research on Sustainable Development, CEPED<br>Noah Noah, Dominique; Hopital Central de Yaounde<br>Tchoumi, Eric Pascal; Hopital Central de Yaounde<br>Vidal, Laurent; French Institute for Research on sustainable Development, SESSTIM<br>Kuaban, Christopher; Faculty of Medicine and Biomedical sciences, University of Yaoundé 1<br>Carrieri, Maria Patrizia; SESSTIM<br>Boyer, Sylvie; SESSTIM; IHU Mediterranee Infection |
| Keywords:                     | Viral hepatitis, Public health < INFECTIOUS DISEASES, Cameroon                                                                                                                                                                                                                                                                                                                                                                                                       |
|                               |                                                                                                                                                                                                                                                                                                                                                                                                                                                                      |

SCHOLARONE™  
Manuscripts

**Manuscript.**

(Total word count without and abstract = 4898)

**Title:**

**Screening for viral hepatitis B and C in Yaoundé, Cameroon: coping with uncertainty and unbearable costs**

**Authors:**

**Fanny Chabrol<sup>1,3,§</sup>, Dominique Noah Noah<sup>2</sup>, Eric Pascal Tchoumi<sup>2</sup>, Laurent Vidal<sup>3</sup>, Christopher Kuaban<sup>4</sup>, Patrizia Carrieri<sup>4,5</sup>, Sylvie Boyer<sup>4,5</sup>, for the EVOLCam group\***

**Authors' affiliations:**

<sup>1</sup> Institute For Research on sustainable Development, (IRD), Centre Population et Développement (CEPED), Universités Paris Sorbonne Cités, ERL INSERM SAGESUD

<sup>2</sup> Gastroenterology Service, Hôpital Central de Yaoundé

<sup>3</sup> Aix Marseille Univ, INSERM, IRD, SESSTIM, Sciences Economiques & Sociales de la Santé & Traitement de l'Information Médicale, Marseille, France

<sup>4</sup> Department of Internal Medicine and Subspecialties, Faculty of Medicine and Biomedical Sciences, University of Yaoundé I, Yaoundé, Cameroon

<sup>5</sup> ORS PACA, Observatoire régional de la santé Provence Alpes Côte d'Azur, Marseille, France

\* The members of the EVOLCAM study group are listed in the acknowledgments

**§ Corresponding author**

Fanny Chabrol, PhD

Institute For Research on sustainable Development, (IRD), Centre Population et Développement (CEPED), Universités Paris Sorbonne Cités, ERL INSERM SAGESUD; 45 rue des saint Pères. 75006 Paris; Tel: + 33 01 76 53 34 71/50; [fannychabrol@yahoo.fr](mailto:fannychabrol@yahoo.fr)

## Abstract

**Objectives.** To document patient and healthcare professionals (HCP) experiences with HBV and HCV diagnosis and care, as well as consequences of these infections on patients' life trajectories in Cameroon, an endemic country in Sub-Saharan Africa.

**Design.** Qualitative sociological study combining in-depth interviews and observations of medical consultations. Interviews and observations transcripts were thematically analyzed according to the following themes: circumstances and perceptions surrounding hepatitis screening, counselling and disclosure, information provided by HCP on hepatitis prevention and treatment, experiences of access to care and treatment, social/economic trajectories after diagnosis.

**Setting:** HIV and gastroenterology/medical services in two reference public hospitals in Yaoundé (Cameroon).

**Participants.** 12 patients affected by HBV and/or HCV (co-infected or not with HIV), 14 healthcare professionals, 14 state and international stakeholders.

**Findings.** Many patients are screened for HBV and HCV at a time of great emotional and economic vulnerability. The information and counselling delivered after screening/diagnosis is limited and patients report feeling alone, distressed, and unprepared to cope with their infection. After screening positive, patients struggle with out-of-pocket expenditures related to the large number of tests prescribed by physicians to assess disease stage and to decide whether treatment is needed. These costs are so exorbitant that many renounce clinical and biological follow-up. For those who do pay, the consequences on their social and economic life trajectories are catastrophic.

**Conclusion.** Large out-of-pocket expenditures related to biological follow-up and treatment pose a real challenge for receiving appropriate care and patients have limited opportunity to start treatment. Free or reasonably-priced access to hepatitis treatments can only be effective and efficient at reducing the hepatitis disease burden if the whole package of pre-therapeutic check-up and treatment is standardized, simplified and subsidized by national comprehensive policies orientated towards universal health care.

## Summary. Strengths and limitations of this study

- To our knowledge, this is the first study to show that hepatitis B and C screening in Cameroon is performed at an inopportune moment when patients are very vulnerable, both emotionally and economically.
- The qualitative design of the study is suitable to demonstrate why the costs of care prevent most patients from accessing much needed care and have a detrimental impact on their social and economic life trajectories.
- This study was only conducted in Yaoundé and thus does not reflect what happens elsewhere in Cameroon, especially in rural areas and in other Sub-Saharan countries.
- This study was conducted before the announcement of arrival of Directly Acting Antivirals in Yaoundé. However challenges related to access to pre-therapeutic tests and then to treatment remain.

## Introduction

According to the 2017 WHO Global hepatitis report [1], 257 million people are chronically affected by hepatitis B virus (HBV) and 71 million by hepatitis C virus (HCV) worldwide. Sub-Saharan Africa is one of the hotspots of these two epidemics. HBV infection is widespread in the continent, affecting more than 8% of the population in West and Central Africa, reaching 15% in some areas [2]. HCV infection is less evenly distributed with prevalences ranging from 1% in Senegal to 6.1% in Burkina Faso [3].

HBV and HCV are blood-borne infections but their main routes of transmission in Sub-Saharan Africa differ [4]. HBV is mainly transmitted at birth from mother to child (vertical transmission), during childhood through contacts with infected blood (horizontal transmission) or through sexually (exchange of body fluids) or unsafe medical practices. HCV is mainly contracted parenterally through blood transfusion, unsafe medical practices and drug injection [5]. HBV and HCV disease progression leads to liver fibrosis, cirrhosis and hepatocellular carcinoma [6]. Antiviral treatments for HBV (e.g., Tenofovir®) and direct acting antivirals (DAA) for HCV can control viral replication, prevent disease-associated complications and even cure HCV [1]. Antiviral treatment for pregnant women living with chronic HBV infection is also required to prevent vertical transmission.

Viral hepatitis is a silent killer, long neglected in Sub-Saharan Africa [4]. Most countries in the region lack national hepatitis prevention and treatment programs. Vaccination against HBV is included in immunisation programs but coverage is poor [1]. Immunisation at birth, which is now recommended to reduce vertical transmission, has only been adopted in a few countries [7]. Screening is suboptimal and late diagnosis (i.e. when symptoms appear) is extremely frequent [4]. Moreover, the availability of effective antiviral treatments for HBV and DAA is very limited in most African health systems.

1  
2  
3 There is however a growing awareness about the global burden of viral hepatitis and  
4 its impact on communities' welfare. Upon the first resolution adopted in 2010 by the World  
5 Health Assembly which called for interventions for both prevention and control of viral  
6 hepatitis, the World Health Organization provided international guidelines for viral hepatitis  
7 screening and drew attention on this "urgent public health matter" [1], [8]. In addition,  
8 following the Dakar Call in July 2011 [9], healthcare professionals (HCP) in Africa advocated  
9 for mobilization to fight against viral hepatitis in the continent and collaborations involving  
10 health professionals and societies of gastroenterologists continue to grow today.

11  
12  
13  
14  
15  
16  
17  
18  
19  
20  
21 Despite the fact that HBV and HCV bring acute and complex challenges to HCP,  
22 patients, and health systems in general in Sub-Saharan African countries, most of these  
23 challenges remain dramatically under-studied. Comprehensive assessments of the  
24 circumstances and experiences of patients and HCP surrounding diagnosis, counselling and  
25 care for both diseases are sparse [10]–[12], especially in countries with poor access to related  
26 medical care. In this study, we aimed to document the circumstances and perceptions  
27 surrounding HBC and HCV screening and counselling, as well as the experiences regarding  
28 access to care and treatment, and the impact these infections have on social and economic  
29 trajectories of patients in Yaoundé, the capital city of Cameroon.

## 30 31 32 33 34 35 36 37 38 39 40 41 42 43 44 45 **Methods**

### 46 47 48 49 *Context*

50  
51 In Cameroon, two recent meta-analyses estimated HBV and HCV prevalence at 11.2%  
52 and 4.9%, respectively, in adults of the general population [3], [13]. The south-east region of  
53 the country also has one of the largest iatrogenic HCV epidemics in people over 50 [14]. This  
54 explains discrepancies in estimations of HCV prevalence in Cameroon which vary between  
55 0.40 and 55.88% according to subpopulation type, age group and geographical location [13].  
56  
57  
58  
59  
60

1  
2  
3 Currently, the country has no national viral hepatitis program or national guidelines on  
4 screening, care and treatment for these infections. At the time of this study, hepatitis testing  
5 was mainly proposed when patients presented with symptoms, or were diagnosed HIV-  
6 positive. HBV screening was systematically proposed during antenatal care. In addition,  
7 screening for both diseases was compulsory to register for national competitive examinations  
8 for enrolment in the national police force and national school of administration. At the  
9 beginning of the 2010s, the Cameroon Society of Gastroenterology, involving a dozen of  
10 hepato-gastroenterologists, initiated a collaborative project with public health officials and  
11 researchers to promote access to hepatitis treatment. With respect to HBV infection, access to  
12 antiretroviral treatment (Tenofovir® or Lamivudine®) was initially only available within the  
13 national HIV program. Accordingly, only HIV-HBV coinfecting patients benefitted from it.  
14 This policy changed in April 2014 when Tenofovir® prescription was allowed outside the  
15 HIV program at a price of 6.8 euros per month, but only in Douala and Yaoundé. For HCV  
16 infection, only Interferon-based treatments were available in 2014. Eligibility committees set  
17 up in Yaoundé and Douala by the Ministry of Public Health in August 2012 decided which  
18 patients could access treatment, at a cost to the patient of 7,500 euros and 11,200 euros (for 48  
19 weeks and 72 weeks, respectively, depending on treatment response), including a discount of  
20 33% (extended to 50% in 2014) (See Table 1). Before initiating treatment, patients had to  
21 complete a full pre-therapeutic assessment, which included a large number of tests for a  
22 global cost of between 220 and 440€, depending on the number and nature of the tests  
23 performed (see Table 1).  
24  
25  
26  
27  
28  
29  
30  
31  
32  
33  
34  
35  
36  
37  
38  
39  
40  
41  
42  
43  
44  
45  
46  
47  
48  
49  
50  
51  
52  
53

#### ***Study design***

54 We conducted a qualitative sociological study combining observations and in-depth  
55 individual interviews between April and September 2014, primarily in Yaoundé. This study  
56  
57  
58  
59  
60

1  
2  
3 was part of the ANRS 12288-EVOLCAM cross-sectional mixed methods survey which aimed  
4  
5 to study current challenges faced by Cameroon's national antiretroviral treatment program in  
6  
7 the care and treatment of major HIV co-infections, namely viral hepatitis and tuberculosis  
8  
9  
10 [15].  
11

### 12 *Data collection*

13  
14 Individual in-depth interviews targeted three main categories of individuals who were invited  
15  
16 to participate in the study: i) key stakeholders involved in the care and treatment of hepatitis,  
17  
18 both at the international and national level, including senior ministry of health officials and  
19  
20 leaders on international NGOs, ii) healthcare professionals, mainly gastroenterologists  
21  
22 working in three reference hospitals of Yaoundé (Hôpital Central, Hôpital Général and CHU),  
23  
24 one private clinic in Yaoundé, and one district hospital near Yaoundé; iii) patients consulting  
25  
26 for hepatitis-related symptoms in two of these five facilities (Hôpital Central and Hôpital  
27  
28 Général). In addition, observations to assess doctor-patient relationships were conducted  
29  
30 during medical rounds in the gastroenterology ward or outpatient medical consultation spaces  
31  
32 of these two facilities.  
33  
34  
35  
36

37  
38 Study participation was proposed to patients after their consultation. Those who  
39  
40 agreed to share their experiences and perceptions were contacted by phone to fix an  
41  
42 appointment for an interview outside of the hospital, usually at their home. Interviews were  
43  
44 repeated with some of the patients to obtain more insight into their social life and experience  
45  
46 with the infection. The following themes were approached using a semi-structured guide:  
47  
48 context of screening, quality of information and counselling, experience of diagnosis, risk  
49  
50 perceptions, disclosure related issues, costs engaged after diagnosis and difficulties  
51  
52 encountered in seeking care and treatment. All interviews were conducted in French and  
53  
54 audio-recorded with participant authorisation. Moreover, information about current health  
55  
56 policies and the health system in relation to HBV and HCV, liver complications and  
57  
58  
59  
60



1  
2  
3 associated costs, was also collected through national and international reports as well as  
4  
5 national and international press.  
6  
7  
8  
9

### 10 ***Analysis***

11 We used a grounded theory approach to viral hepatitis management as it is recognised as a  
12  
13 powerful tool to describe novel and poorly understood phenomena [16] and because it  
14  
15 allowed the research team to adapt the interview and observation guides to new questions  
16  
17 which emerged during data collection. Preliminary results were first discussed during two  
18  
19 workshops with the qualitative researchers and then with the whole EVOLCAM team, in  
20  
21 order to triangulate qualitative evidence with quantitative results and to incorporate new items  
22  
23 into the data collection tools, if needed. Audio recordings of interviews and notes taken  
24  
25 during observations were transcribed, analysed and coded manually. Codes were defined  
26  
27 together with the research team around issues including soundness of knowledge on hepatitis,  
28  
29 amount and quality of information, health expenses, time taken between consultation and  
30  
31 exams, expectations of care, reference to HIV programs. Textual analysis was then  
32  
33 undertaken, identifying specific sub-themes through occurrences and recurrences and analysis  
34  
35 of correlations.  
36  
37  
38  
39  
40  
41  
42

### 43 ***Patient and public involvement***

44 Patients were not involved in the development of the research question, the design,  
45  
46 recruitment or conduct of this study. The results of this study were disseminated to medical  
47  
48 students and public health responsible during a public meeting in Yaoundé in November  
49  
50  
51 2016.  
52  
53  
54  
55  
56

### 57 **Findings**

### ***Institutional stakeholders, experts and healthcare professionals***

In-depth interviews were conducted with 14 institutional stakeholders including 2 public health representatives of the Health Ministry, 3 international experts and researchers, 7 members of international or local NGO and 2 other pertinent stakeholders (media, pharmaceutical company). We also interviewed 14 healthcare professionals: two nurses, six gastroenterologists, three infectious disease specialists, one haematologist, one general practitioner and one social worker (Table 2).

### ***Patients***

A total of 16 interviews were conducted with 12 different patients aged between 24 and 65 years. Most (9/12) were women and all had a diagnosis of chronic hepatitis (Table 3): 5 with HBV, 1 with HCV, 3 with HBV and HIV and 3 with HCV and HIV. Interviews were repeated with three patients, while another patient was interviewed with her father and mother-in-law present at their request. Patients typically had a low-middle class socioeconomic status, and lived in Yaoundé or its suburbs. Their occupational status included the following: students (2), retired (3), school teacher (1), embroider (1), street merchant (1), pharmacy assistant (1), security guard (1). None earned more than the average national monthly salary (50€) and the majority had irregular income, as they worked in small business or relied on family contributions.

### ***Observations in hospital wards***

A total of 52 consultations in HIV services and 82 consultations in the gastroenterology wards were observed. Of the latter, 49 dealt with a viral hepatitis-related condition: 16 patients were consulting because of symptoms, 12 following positive diagnosis after a blood donation, 8 during follow-up for another disease (HIV), 6 on their own initiative in anticipation of a

1  
2  
3 marriage or a national competitive exam, 5 following antenatal screening and 2 after a  
4  
5 screening campaign at their workplace.  
6  
7  
8  
9

### 10 *Screening occurring at an inopportune moment*

11 According to our observations, approximately 33% (16/49) of the consultations were related  
12  
13 to patients who discovered they had hepatitis after the onset of symptoms like long episodes  
14  
15 of fatigue or ascites (accumulation of fluid in the peritoneal cavity) and subsequent  
16  
17 investigations by a gastroenterologist. The second most common reason for consultation was  
18  
19 following diagnosis after blood donation: approximately 24% (12/49 consultations) had been  
20  
21 referred from the hospital blood bank where they were tested positive for either HBV or  
22  
23 HCV. In Cameroon, blood donations rely on “family replacement” whereby the hospitalized  
24  
25 patient’s closest relatives are responsible for obtaining blood at the blood bank. They can only  
26  
27 obtain this blood if they themselves donate their own blood to the bank. Accordingly, they are  
28  
29 tested for hepatitis at a particularly vulnerable emotional moment.  
30  
31  
32  
33  
34

35 It all started when my dad had an accident. If I hadn’t been asked to give blood I wouldn’t have known I  
36 was sick (...). When I got back to the blood bank to fetch my results they said to me the results were not  
37 good because she saw I was positive for hepatitis B. Well, it was a shock. (Interview, P1).

38 My daughter was unwell (...) when we arrived at the hospital. They noticed my child didn’t have  
39 enough blood, that she was anaemic. We had to transfuse her (...)- They told me and I had to give  
40 blood, and so I did an hepatitis test. That’s when I started to learn about hepatitis. I didn’t even.... I  
41 didn’t know this term existed (Interview, P4).  
42  
43

44 In the two situations cited above, patients were not at all prepared for the shock  
45  
46 announcement of positive test results. This is likely to be at least partially due to the fact that  
47  
48 they were not part of a voluntary screening process, and therefore had not already shown  
49  
50 concern about their own status. Another frequent circumstance of hepatitis testing was in the  
51  
52 course of HIV follow-up. HIV-positive patients diagnosed with HBV infection could easily  
53  
54 benefit from antiretroviral treatment including Tenofovir. However, for those who discovered  
55  
56 they were HCV-positive, the impact of the announcement was dramatic: after having  
57  
58  
59  
60

1  
2  
3 struggled with HIV infection, they felt condemned again, as evidenced by the reaction of a  
4  
5 HIV-HCV coinfecting woman:

6  
7  
8         So me, I'm simply going to die? (Interview P10).

9  
10 In addition, a non-negligible proportion of the patients (5/46) were consulting after HBV  
11  
12 diagnosis during antenatal care, a very destabilizing situation for future mothers given the  
13  
14 absence of standardized and accessible prophylactic measures in Cameroon to prevent  
15  
16 mother-to-child transmission. One physician stated:

17  
18  
19         In most hospitals screening is systematic among pregnant women but after that there's nothing! These  
20  
21 women are dumped on us and we're asked to take care of them. Those who can afford to pay, do so;  
22  
23 those who can't don't (Interview H4).

### 24 25 *Fragmented and contradictory counselling*

26  
27 When HCP informed patients about their testing positive or when they interpreted laboratory  
28  
29 results during consultation, few details were provided to the patients about hepatitis' modes of  
30  
31 transmission, risk factors, preventive measures and therapeutic options. In some situations,  
32  
33 the information given was alarming and even inaccurate, for example regarding the modes of  
34  
35 transmission of HBV:

36  
37  
38         The lab technician told me it was very, very, very contagious, that I have to be very careful because it  
39  
40 [hepatitis B] is transmitted through sweat (Interview P1).

41  
42 Moreover, information was often contradictory, especially regarding how serious hepatitis  
43  
44 infection can be. Patients also deplored the lack of communication with healthcare  
45  
46 professionals who, in their opinion, did not dedicate enough time to explain the infection and  
47  
48 its evolution.

49  
50         I'd like someone to explain my result to me, that I'm at this stage or that stage, but no one's ever told  
51  
52 me (Interview P5).

53  
54 As a result, patient knowledge was usually incomplete: they only had piecemeal information  
55  
56 gathered or remembered from their own experiences or those of their close kin and friends,  
57  
58 and from the radio. The absence of standardized information guidelines and lack of medical  
59  
60

1  
2  
3 communication led to a very negative and worrying representation of life with the virus as  
4  
5 well as a very dark prognosis.  
6  
7

8 I was always told it's a virus with no symptoms and that it always kicks in at the terminal stage; when it  
9 hits, maybe it's "hello death" (Interview P1)

10 Prevention campaigns and radio broadcasts tended to encourage this image with the aim of  
11  
12 attracting patients to testing campaign sites.  
13  
14

15  
16 On hepatitis day, on the radio they talked about how to get tested, that's when I understood. They talked  
17 about how you get the disease and that you have to go to the centre and get tested... go to the hospital,  
18 but that takes time. People say that it's a very risky disease, that it kills you....it kills for sure, it kills  
19 silently, that's what people say (Interview P5).

### 20 21 22 ***Moral and social destabilization***

#### 23 24 25 Stress about infection and its evolution

26  
27 When patients learned of their hepatitis infection, they experienced great stress, which  
28  
29 manifested itself in anxiety. During medical consultations, as well as in interviews afterwards,  
30  
31 patients were very affected at a psychological level, as shown in this quotation from a young  
32  
33 man:  
34

35  
36 Honestly I am terrified by this situation (...) Just knowing you have it makes you sick. When you  
37 already know you have it, you can't think anymore that you're in good health (Interview P1).

38  
39 Patients were particularly worried about the evolution of their infection, wondering what they  
40  
41 could expect and whether treatment was available.  
42  
43

44  
45 When I discovered I had hepatitis I thought about going for treatment. Then I understood that you have  
46 to be sick before you can take remedies. I often wonder when I'm going to become sick, at what age.  
47 For now, I try not to contaminate other people (Interview P2).

48 I only want someone to tell me how I can treat this (Interview P10).

49 This strongly contrasted with the experience of HIV-HBV coinfecting persons who were  
50  
51 following an antiretroviral treatment that can control both infections. The great majority of  
52  
53 patients considered the worst-case scenario and foresaw a fatal outcome.  
54  
55

56  
57 When the level [of the virus] isn't high, you can be treated, but when you've already got a high level,  
58 it's difficult... you're already on the way to dying (...) When it's attacked the liver and eaten it away,  
59 what are you going to treat? (Interview father of P3).

### Fear about contaminating others

Patients were very anxious about the likelihood of contaminating close relatives. During consultations, the possibility of testing and vaccinating partners and family members and the means of prevention in general were rarely discussed, thereby increasing patient anxiety about virus transmission and the best preventive behaviours to adopt.

I suffer so bad when I think I can contaminate someone. It makes me suffer a lot and so I wonder how I can take precautions (Interview P1)

Due to a lack of appropriate information, patients modified their daily routines and took many restrictive precautions:

When I drink water, I hide the bottle, so that no one can drink after me (Interview P2)

One patient explained the various precautions he took to avoid sharing meals with his family and friends, while another said that he no longer slept next to one family member for fear of contamination by sweating at night.

### Disclosure of infection

Disclosing one's infection to friends and family was a difficult issue for patients. However, why and how to disclose one's infection were rarely discussed during the medical consultation. Most of the time, disclosure was necessary to solicit moral and financial support. That said, it could also lead to being left alone:

I said to my fiancée, "you are free to go where you want". I wanted to see what she would do. She never came back (Interview P2).

### ***Catastrophic health expenditures***

#### Huge expenses with little perspective of treatment

Numerous tests are prescribed to assess the stage of hepatitis infection and the degree of liver damage in order to decide upon the need of treatment. In Cameroon, access to care and

1  
2  
3 treatment depend on patients' capacity to pay for these tests, as most specialist physicians  
4  
5 acknowledged:

6  
7  
8 The speed with which patients get care depends on the head of the family's pocket (Interview H4)

9 The problem we have with hepatitis B is the exorbitant cost of the check-ups for patients, who are most  
10 often students and cannot afford to pay, so we can't follow them (Interview H3).

11  
12 Given the exorbitant costs of tests (150-200 €), it was very rare that patients were able to  
13  
14 perform the entire pre-therapeutic check-up.

15  
16  
17 What worried me the most is that the doctor said this disease is almost incurable and that you'd need  
18 enormous amounts of money, like millions [of FCFA, i.e. thousands of euros]. So I said to myself 'ok  
19 well if it's like that, then I'll sit at home and wait for death' (Interview P10).

20 Moreover, in order to correctly assess the disease stage, all these tests need to be performed  
21  
22 about the same time. As patients need time to gather money, this is practically impossible.

### 23 24 25 26 27 Bifurcation of life trajectories

28 Patients were most often screened when their financial resources were already strained  
29  
30 because of health expenditures mobilized for a hospitalized family member or for themselves  
31  
32 and this additional bill had catastrophic consequences on their social and economic life  
33  
34 trajectories. They had to depend on the generosity of friends, their community, village  
35  
36 solidarity or *Tontines* (Informal Financial Sector associations). To gather money, family  
37  
38 solidarity came under great strain:  
39  
40  
41

42  
43 I went crying to my older sisters. They gave me money to open a small business. I spent everything to  
44 pay for the exams. Now I am here with no money (...). If I had to rely on my husband, it'd be a waste of  
45 time (Interview P5)

46 The social and economic destabilization of hepatitis diagnosis was especially hard felt by  
47  
48 patients starting a personal or professional project. One patient decided to cancel a wedding  
49  
50 while another postponed having a child. In the professional domain, one young man gave up  
51  
52 on studying at university because he knew that family expenses had already been mobilized to  
53  
54 treat his father and therefore that he himself had to pay for his own future medical expenses.  
55  
56

57  
58 It's not easy, I was shaken by that [*hepatitis diagnosis*] because I was told the treatment is so, so  
59 expensive. I understood that I had to find money and I realised that I couldn't think about school  
60

1  
2  
3 anymore. I wanted to start engineering school next year but when I saw that *[diagnosis]* my only  
4 thought was that I needed to find a way to take care of myself, so I thought about working in  
5 construction sites » (Interview P1).

6 A young professional embroider thought about selling his embroidery machine, his main  
7 working tool, in order to gather money to pay for hospital fees. **The same happened to a**  
8  
9 **woman, mother of four children:**  
10  
11  
12

13  
14 I wanted to start a dress-making business but the little money that I had was for school fees and for  
15 starting a business, and now I pay for health care. (Interview P5)

16 HBV and HCV screening is compulsory to register at most national competitive entrance  
17 examinations. A positive diagnosis usually implies ineligibility, and thus a sudden and  
18 complete change in one's life project.  
19  
20  
21  
22

### 23 24 25 Therapeutic dead-end: distress and powerlessness

26 Recently diagnosed patients did not have access to treatment, even after finishing the pre-  
27 therapeutic check-up. Besides exorbitant test costs, the costs of treatment, especially for HCV,  
28 were unbearable for the large majority of patients. Most health professionals and public health  
29 managers denounced this situation as unfair, as it produced a form of triage, as acknowledged  
30 by this physician:  
31  
32  
33  
34  
35  
36  
37  
38

39 Only a few people benefit from insurance schemes - like civil servants, or people whose employers  
40 have an insurance scheme - and have access to this program [for pre-therapeutic assessment], but they  
41 still have to pay for the injections (Interview I1).

42 The distress generated by this therapeutic dead-end was shared by patients and HCP alike.  
43 Doctors and families were outraged as sick patients hospitalized for pathologies associated  
44 with viral hepatitis, such as liver cancer and cirrhosis, have a very poor prognosis.  
45  
46  
47

48 It hurts when we see these young persons who are dying, when they arrive all we are left with are our  
49 eyes to cry (Interview H3).

50 There was also a lack of palliative care and pain management due to insufficient equipment  
51 and human resources.  
52  
53  
54

55 In my opinion, hepatitis care today for middle-income people... we lose them [i.e., they die]... they only  
56 come when they already have complications... we lose almost all of them (Interview H1).  
57  
58  
59  
60



1  
2  
3 Because they feel they will not receive a concrete response from hospital services, many  
4  
5 patients seek relief through traditional or “indigenous” medicine, which is comparatively less  
6  
7 costly:  
8  
9

10 You see, in Africa we say that people really like going for traditional medicine because with say  
11 100,000 FCFA (152 €), you get traditional treatment. But with modern medicine, like, an exam costs  
12 200,000 FCFA (305 €), that means you need another 200,000 FCFA even before starting treatment...  
13 and that’s impossible if you haven’t already put it away somewhere (Interview father of P3).

14 Here a patient has no other option but to go back to the village (neighbourhood) and leave it up to  
15 traditional medicine (Interview P4)

16  
17 Most patients interviewed truly appreciated and recognized the value of traditional medicine,  
18  
19 especially its ability to alleviate the fatigue and pain associated with viral hepatitis infection.

20  
21 They also praised the quality of care and attentiveness provided by traditional healers.

22  
23  
24 I’m not the type to tremble when someone tells me something. I shook once and my husband supported  
25 me ... today I don’t have any more problems, no matter what they tell me, I try to manage according to  
26 my means and if that doesn’t work, I just let it go, and from time to time there are also little pieces of  
27 bark [traditional medicine] from home that also have their value, which we take from time to time  
28 (Interview P10).  
29

## 30 31 32 Discussion

33 This is the first study to explore contexts, experiences and perspectives of both  
34  
35 healthcare professionals and patients regarding hepatitis screening, care and treatment in  
36  
37 Yaoundé, Cameroon, where HBV and HCV are endemic. Our findings demonstrated that in  
38  
39 this setting, hepatitis screening does not offer the opportunity to subsequently enter into care  
40  
41 and treatment, mainly because of unaffordable related costs. Four major challenges to  
42  
43 screening and diagnosing hepatitis B and hepatitis C emerged from the patients’ and HCP  
44  
45 interviews. First, very often, hepatitis infection is discovered in difficult circumstances, when  
46  
47 patients have already started to experience diseases symptoms or following a blood donation  
48  
49 for a hospitalized family member. In both situations, the cumulative emotional and financial  
50  
51 difficulties hamper patients from making sense of the diagnosis. Second, patients are not  
52  
53 provided adequate information or counselling on risk factors and preventive measures  
54  
55 including vaccination of relatives. This results in inadequate and stigmatising prevention  
56  
57  
58  
59  
60

1  
2  
3 practices, both from an epidemiological and clinical point of view. Little information and  
4  
5 counselling about the chronic nature and severity of their disease and about treatment options  
6  
7 also strongly affected patients psychologically. Third, in Cameroon, a positive diagnosis  
8  
9 immediately leads to enormous out-of-pocket (OOP) expenditures related to the pre-  
10  
11 therapeutic check-up, which is prescribed to assess the disease stage and decide whether  
12  
13 treatment is needed. These tests cost between 220 to 440 euros (i.e., approximately 5 to 8  
14  
15 times Cameroon's average monthly salary) [10]. Such OOP expenditures become  
16  
17 unsurmountable barriers to accessing treatment, except for HIV-HBV coinfecting patients  
18  
19 whose antiretroviral treatment (Tenofovir) is also effective for HBV. Fourth, diagnosis of  
20  
21 chronic hepatitis not only means coping with an infection but also produces a rupture in a  
22  
23 person's life trajectory. In this study, patients interviewed were representative of the lower-  
24  
25 middle socioeconomic class in Yaoundé: their income was irregular, coming from activities in  
26  
27 the informal sector, and they had no health insurance. The out-of-pocket expenditures  
28  
29 required to perform the pre-therapeutic check-up were so high that they had detrimental  
30  
31 consequences on all their life projects, for example weddings, child bearing, education and  
32  
33 business development. They also contributed to increase their social dependence and  
34  
35 economic vulnerability, with patients risking poverty and debt, being obliged to sell their  
36  
37 assets and/or to rely on the financial support of their social network.  
38  
39  
40  
41  
42  
43

44  
45 Our study corroborates the results of other studies in Sub-Saharan Africa pointing to  
46  
47 serious patient destabilisation associated with HBV diagnosis, inability to pay for medical  
48  
49 care and feelings of injustice [11]. However, the impact of HBV and HCV on life trajectories  
50  
51 have rarely been documented in qualitative studies, which mainly focus on patients'  
52  
53 representations and experiences of HBV infection [11], on obstacles to linkage to care after  
54  
55 diagnosis of HBV [12] and on access to HCV treatment [10]. In line with studies on linkage  
56  
57 to care [4] [12], we identified large barriers for patients diagnosed with HBV or HCV, mainly  
58  
59  
60

1  
2  
3 at the structural level, including i) a lack of adequate training of HCP which resulted in  
4  
5 frequent misconceptions regarding transmission, natural history and diagnosis, ii) a lack of  
6  
7 simple, reliable, and low-cost diagnostic tests and iii) a lack of funding allocated to the fight  
8  
9 against hepatitis, which results in unaffordable user fees for prevention, care and treatment. In  
10  
11 contrast with other diseases such as HIV, TB or malaria, where international funding led to  
12  
13 the expansion of prevention and care in low-resource settings, there is currently no financial  
14  
15 mechanism dedicated to supporting prevention and treatment of viral hepatitis in these  
16  
17 settings. Considering the size of the financial barrier to care and treatment access, this calls  
18  
19 for a multilateral commitment from governments, funders, pharmaceutical firms, researchers  
20  
21 and patient communities [17]. More specifically, our results highlight the urgent need for a  
22  
23 comprehensive national programme in Cameroon for the screening, care and treatment of  
24  
25 HBV and HCV. Screening uptake and access to a subsidized pre-therapeutic package could be  
26  
27 enhanced through technological innovations and point-of-care devices at a reduced cost [18],  
28  
29 [19]. To reach this goal, lessons from HIV should be drawn. To improve access to care, the  
30  
31 use of low-cost generic drugs and subsidized treatment should also be promoted. While HBV  
32  
33 treatment is currently relatively financially accessible, costing between 5.10 to 6.80 euros per  
34  
35 month, we recommend free access for mono-HBV patients, as user fees reduce adherence and  
36  
37 treatment effectiveness, something already demonstrated for HIV [20], [21]. With respect to  
38  
39 HCV treatment, the large decrease in prices obtained recently for DAA with the arrival of  
40  
41 generics drugs have led to those treatments becoming very cost-effective in Cameroon [22].  
42  
43 However, at current prices (approximately 580-600 euros for a 12-week Sofosbuvir-based  
44  
45 regimen)[23], such treatments will remain inaccessible for the large majority of the  
46  
47 population if they are not subsidized.  
48  
49  
50  
51  
52  
53  
54

55  
56 This study has limitations. It was only conducted in Yaoundé and thus does not reflect  
57  
58 what happens elsewhere in Cameroon, especially in rural areas. However, we can hypothesize  
59  
60

1  
2  
3 that challenges to care access are even more severe there as most specialists including  
4 gastroenterologists are located in Yaoundé and in Douala. In addition, the study took place in  
5 2014 before the 2016 announcement by the Cameroonian ministry of Health about the future  
6 availability of DAA [24]. Since then, DAA costs have substantially decreased. However, as  
7 previously seen, challenges related to access to pre-therapeutic tests and then to treatment  
8 remain, as current prices are still far above the financial capacity of the population.  
9  
10  
11  
12  
13  
14  
15  
16  
17  
18

19 **Conclusion.** Free or reasonably-priced access to hepatitis treatments in Cameroon can only  
20 be effective and efficient at reducing the hepatitis disease burden, if the whole package of pre-  
21 therapeutic check-up and treatment is standardized, simplified and subsidized by national  
22 comprehensive policies orientated towards universal health care. Our results are in line with  
23 the Sustainable Development Goals.  
24  
25  
26  
27  
28  
29  
30  
31  
32  
33  
34

### 35 **Contributors**

36 FC, DNN, PET participated in the collection of data. FC and SB were responsible for data analysis  
37 and interpretation of results and FC wrote the first draft of the manuscript. SB, PC, DNN, CK and LV  
38 contributed to reviewing the manuscript. SB, LV and CK were involved in the design and  
39 implementation of the ANRS EVOLCam survey. CK, LV were the principal investigators of the  
40 survey. All authors approved the final version of the manuscript. All authors had full access to all of  
41 the data in the study and take responsibility for the integrity of this data, as well as the accuracy of the  
42 data analysis.  
43  
44  
45  
46  
47  
48  
49  
50  
51

### 52 **Funding**

53 This study was financially supported by the French National Agency for Research on AIDS and viral  
54 hepatitis (ANRS), and a postdoctoral grant from Sidaction and the study was approved by the  
55 Cameroonian Ministry of Public Health.  
56  
57  
58  
59  
60

## Competing interests

None declared.

## Ethics approval

The Ethics Review Board of the Ministry of Public Health of Cameroon granted ethical approval for this study. Patients and health professionals gave informed consent prior to interviews and observations.

## Data sharing statement

No additional data available.

## Acknowledgements

We thank all patients and from several hospitals in Yaoundé who agreed to participate in the study. We also thank Jude Sweeney for revising and editing the English version of the manuscript.

\*The EVOLCAM study group: C. Kuaban, L. Vidal (principal investigators); G. Maradan, A. Ambani, O. Ndalle, P. Momo, C. Tong (field coordination team); S. Boyer, V. Boyer, L. March, M. Mora, L. Sagaon Teyssier, M. de Sèze, B. Spire, M. Suzan Monti (UMR912 – SESTIM); C. Laurent, F. Liégeois, E. Delaporte, V. Boyer, S. Eymard Duvernay (TransVIHMI); F. Chabrol, E. Kouakam, O. Ossanga, H. Essama Owona, C. Biloa, M.T. Mengue (UCAC); E. Mpoudi Ngolé (CREMER); P.J. Fouda, C. Kouanfack, H. Abessolo, N. Noumssi, M. Defo, H. Meli (Hôpital Central, Yaoundé); Z. Nanga, Y. Perfura, M.Ngo Tonye, O. Kouambo, U. Olinga, E Soh (Hôpital Jamot, Yaoundé); C. Ejangue, E. Njom Nlend, A. Simo Ndongo (Hôpital de la Caisse, Yaoundé); E Abeng Mbozo'o, M. Mpoudi Ngole, N. Manga, C. Danwe, L. Ayangma, B. Taman (Hôpital Militaire, Yaoundé); E.C. Njitoyap Ndam, B. Fangam Molu, J. Meli, H. Hadja, J. Lindou (Hôpital Général, Yaoundé); J.M. Bob Oyono, S. Beke, (Hôpital Djoungolo, Yaoundé); D. Eloundou, G. Touko, (District Hospital, Sa'a); J.J. Ze, M. Fokoua, L.Ngum, C. Ewolo, C. Bondze (District Hospital, Obala); J.D. Ngan Bilong, D. S.Maninzou, A. Nono Toche (Hôpital St Luc, Mbalmayo); M.Tsoungi Akoa, P. Ateba, S. Abia (District Hospital, Mbalmayo); A. Gutierrez, R. Garcia, P. Thumerel (Catholic Health Centre, Bikop); E. Belley Priso, Y Mapoure, A. Malongue, A.P. Meledie Ndjong, B. Mbatchou, J. Hachu, S. Ngwane (Hôpital Général, Douala); J. Dissongo, M. Mbangue, Ida Penda, H. Mossi, G. Tchatchoua, Yoyo Ngongang, C.Nouboue, I. Wandji, L. Ndalle, J. Djene (Hôpital Laquintinie, Douala); M.J. Gomez, A. Mafuta, M. Mgantcha (Catholic Hospital St Albert Legrand, Douala); E.H. Moby, M.C. Kuitcheu, A.L. Mawe, Ngam Engonwei (District Hospital, Bonassama); L.J. Bitang, M. Ndam, R.B. Pallawo, Issiakou Adamou, G.Temgoua (District Hospital, Deido); C.Ndjie Essaga, C. Tchimou, A. Yeffou, I. Ngo, H. Fokam, H. Nyemb (District Hospital, Nylon); L.R. Njock, S. Omgnesseck, E. Kamto, B. Takou (District Hospital, Edea); L.JG Buffeteau, F. Ndoumbe, JD Noah, I. Seyep (Hôpital St Jean de Malte, Njombe).

## References

- 1  
2  
3 [1] World Health Organization, « Global Hepatitis Report 2017 », WHO, Geneva, 2017.
- 4 [2] A. Schweitzer, J. Horn, R. T. Mikolajczyk, G. Krause, et J. J. Ott, « Estimations of  
5 worldwide prevalence of chronic hepatitis B virus infection: a systematic review of data  
6 published between 1965 and 2013 », *The Lancet*, vol. 386, n° 10003, p. 1546–1555, 2015.
- 7 [3] J. Riou *et al.*, « Hepatitis C virus seroprevalence in adults in Africa: a systematic  
8 review and meta-analysis », *J Viral Hepat*, vol. 23, n° 4, p. 244-255, avr. 2016.
- 9 [4] M. Lemoine, S. Eholié, et K. Lacombe, « Reducing the neglected burden of viral  
10 hepatitis in Africa: strategies for a global approach », *Journal of hepatology*, vol. 62, n° 2, p.  
11 469–476, 2015.
- 12 [5] J. Pépin et A. C. Labbé, « Noble goals, unforeseen consequences: control of tropical  
13 diseases in colonial Central Africa and the iatrogenic transmission of blood-borne viruses »,  
14 *Tropical Medicine & International Health*, vol. 13, n° 6, p. 744-753, 2008.
- 15 [6] M. Lemoine et M. R. Thursz, « Battlefield against hepatitis B infection and HCC in  
16 Africa », *Journal of Hepatology*, vol. 66, n° 3, p. 645-654, mars 2017.
- 17 [7] L. Breakwell, C. Tevi-Benissan, L. Childs, R. Mihigo, et R. Tohme, « The status of  
18 hepatitis B control in the African region », *Pan Afr Med J*, vol. 27, n° Suppl 3, juin 2017.
- 19 [8] World Health Organization, « Guidelines on hepatitis B and C testing », WHO,  
20 Geneva, 2015.
- 21 [9] Appel de Dakar, « Conférence internationale des acteurs de lutte contre les hépatites  
22 en Afrique francophone ». 26-juill-2011.
- 23 [10] F. Chabrol, P.-M. David, et G. Krikorian, « Rationing hepatitis C treatment in the  
24 context of austerity policies in France and Cameroon: A transnational perspective on the  
25 pharmaceuticalization of healthcare systems », *Social Science & Medicine*, vol. 187, p.  
26 243-250, août 2017.
- 27 [11] D. Pourette et C. Enel, « Représentations et vécu de l'hépatite B de patients  
28 subsahariens en Côte d'Ivoire et en France », *Santé Publique*, vol. 26, n° 6, p. 869-878, janv.  
29 2015.
- 30 [12] T. Giles-Vernick, F. Hejoaka, A. Sanou, Y. Shimakawa, I. Bamba, et A. Traoré,  
31 « Barriers to Linkage to Care for Hepatitis B Virus Infection: A Qualitative Analysis in  
32 Burkina Faso, West Africa », *The American Journal of Tropical Medicine and Hygiene*, vol.  
33 95, n° 6, p. 1368–1375, 2016.
- 34 [13] J. J. Bigna, M. A. Amougou, S. L. Asangbeh, A. M. Kenne, et J. R. Nansseu,  
35 « Seroprevalence of hepatitis C virus infection in Cameroon: a systematic review and meta-  
36 analysis », *BMJ Open*, vol. 7, n° 8, p. e015748, août 2017.
- 37 [14] R. Njouom *et al.*, « The hepatitis C virus epidemic in Cameroon: genetic evidence for  
38 rapid transmission between 1920 and 1960 », *Infection, Genetics and Evolution*, vol. 7, n° 3,  
39 p. 361–367, 2007.
- 40 [15] C. Tong *et al.*, « Treatment interruption in HIV-positive patients followed up in  
41 Cameroon's antiretroviral treatment programme: individual and health care supply-related  
42 factors (ANRS-12288 EVOLCam survey) », *Trop. Med. Int. Health*, vol. 23, n° 3, p. 315-326,  
43 mars 2018.
- 44 [16] G. Foley et V. Timonen, « Using Grounded Theory Method to Capture and Analyze  
45 Health Care Experiences », *Health Serv Res*, vol. 50, n° 4, p. 1195-1210, août 2015.
- 46 [17] M. Subic et F. Zoulim, « How to improve access to therapy in hepatitis B patients »,  
47 *Liver International*, vol. 38, n° S1, p. 115–121, 2018.
- 48 [18] R. W. Peeling, D. I. Boeras, F. Marinucci, et P. Easterbrook, « The future of viral  
49 hepatitis testing: innovations in testing technologies and approaches », *BMC Infectious  
50 Diseases*, vol. 17, n° 1, p. 699, nov. 2017.
- 51  
52  
53  
54  
55  
56  
57  
58  
59  
60

- 1  
2  
3 [19] L. Duchesne et K. Lacombe, « Innovative technologies for point-of-care testing of  
4 viral hepatitis in low-resource and decentralized settings », *J. Viral Hepat.*, vol. 25, n° 2, p.  
5 108-117, févr. 2018.  
6 [20] S. Boyer *et al.*, « Financial barriers to HIV treatment in Yaoundé, Cameroon: first  
7 results of a national cross-sectional survey », *Bulletin of the World Health Organization*, vol.  
8 87, n° 4, p. 279–287, 2009.  
9 [21] E. J. Mills *et al.*, « Adherence to HAART: a systematic review of developed and  
10 developing nation patient-reported barriers and facilitators », *PLoS medicine*, vol. 3, n° 11, p.  
11 e438, 2006.  
12 [22] S. Boyer, « Cost-effectiveness of Sofosbuvir-Based Hepatitis C regimens in Central  
13 and West Africa (ANRS 12342) », présenté à EASL conference, mars-2018.  
14 [23] World Health Organization, « Progress report on access to hepatitis C treatment »,  
15 Geneva, mars 2018.  
16 [24] B. R. Tietcheu Galani, R. Njouom, et P. F. Moundipa, « Hepatitis C in Cameroon:  
17 What is the progress from 2001 to 2016? », *J Transl Int Med*, vol. 4, n° 4, p. 162-169, déc.  
18 2016.  
19  
20  
21  
22  
23  
24  
25  
26  
27  
28  
29  
30  
31  
32  
33  
34  
35  
36  
37  
38  
39  
40  
41  
42  
43  
44  
45  
46  
47  
48  
49  
50  
51  
52  
53  
54  
55  
56  
57  
58  
59  
60

## Tables

**Table 1. Prices of the tests and treatments available for HBV and HCV screening and treatment in 2014 in Yaoundé, Cameroon**

| Tests or treatment                                      | Unit Price (in euros) | Source                                   |
|---------------------------------------------------------|-----------------------|------------------------------------------|
| <b>Hepatitis B</b>                                      |                       |                                          |
| <i>Screening and pre-therapeutic assessment</i>         |                       |                                          |
| HBs Antigene*                                           | 13.9                  | Centre Pasteur Yaoundé (CPC)             |
| Anti HBc antibodies*                                    | 13.9                  | CPC                                      |
| Anti HBs antibodies*                                    | 13.9                  | CPC                                      |
| HBe Antigene*                                           | 13.9                  | CPC                                      |
| Ag HBe antibodies*                                      | 13.9                  | CPC                                      |
| Transaminases AST/ALT*                                  | 10.3                  | CPC                                      |
| Num NFS*                                                | 5.9                   | CPC                                      |
| Albumin*                                                | 5.5                   | CPC                                      |
| Bilirubin*                                              | 3.0                   | CPC                                      |
| DNA hepatitis B (PCR) viral load*                       | 69.4                  | CPC                                      |
| Gamma-GT (glutamyl-transpeptidases)*                    | 3.2                   | CPC                                      |
| HIV serology*                                           | 13.9                  | CPC                                      |
| Hepatitis delta*                                        | 29.7                  | CPC                                      |
| Hepatic ultrasound*                                     | 12.2                  | Hospital 1                               |
| Fibrotest (not systematically prescribed)               | 135.7                 | CPC                                      |
| Electrophoresis protein (not systematically prescribed) | 83                    | CPC                                      |
| <b>TOTAL</b>                                            | <b>222.6 - 441.3</b>  |                                          |
| <b>Treatment</b>                                        |                       |                                          |
| Tenofovir 300 mg 30cp (monthly treatment)               | 6.8                   | Pharmacy of Hospital 2 (study data)      |
| Lamivudine 300 mg 30cp (monthly treatment)              | 5.1                   | Pharmacy of Hospital 2 (study data)      |
| <b>Hepatitis C</b>                                      |                       |                                          |
| <i>Screening and pre-therapeutic assessment</i>         |                       |                                          |
| Anti HCV antibodies*                                    | 13.9                  | Centre Pasteur Yaoundé                   |
| Transaminases AST/ALT*                                  | 10.3                  | CPC                                      |
| Num NFS*                                                | 5.9                   | CPC                                      |
| Viral load HCV*                                         | 69.3                  | CPC                                      |
| Gamma-GT (glutamyl-transpeptidases)*                    | 3.2                   | CPC                                      |
| Bilirubin*                                              | 3.0                   | CPC                                      |
| Albumin*                                                | 5.5                   | CPC                                      |
| Genotyping (not systematically prescribed)              | 137                   | CPC                                      |
| Hepatic ultrasonound*                                   | 12.2                  | Hospital 1                               |
| Electrophoresis protein (not systematically prescribed) | 83                    | CPC                                      |
| Creatinine*                                             | 2.0                   | CPC                                      |
| <b>TOTAL</b>                                            | <b>125 - 345</b>      |                                          |
| <b>Treatment</b>                                        |                       |                                          |
| <i>Interferon-based treatments</i>                      |                       | <i>Roche Access program (study data)</i> |
| One injection (-30%)                                    | 155                   | Roche Access program (study data)        |
| One injection (-50%)                                    | 86                    | Roche Access program (study data)        |
| Full treatment 48 weeks                                 | 7,500                 | Roche Access program (study data)        |
| Full treatment 72 weeks                                 | 11,200                | Roche Access program (study data)        |



**Table 2. Information on institutional stakeholder and healthcare professionals who participated in the study's semi-structured interviews (N=28)**

|                                  | Position                       | Institution                    | City    |
|----------------------------------|--------------------------------|--------------------------------|---------|
| <b>Institutional actors</b>      |                                |                                |         |
| I1                               | Physician (gastroenterologist) | Ministry of Health             | Yaoundé |
| I2                               | Public health officer          | Ministry of Health             | Yaoundé |
| I3                               | Hepatitis Program              | International Organization     | Geneva  |
| I4                               | Infectious Disease Researcher  | Public Health Research         | Yaoundé |
| I5                               | Virologist                     | Public Health Research         | Yaoundé |
| I6                               | Program leader                 | International NGO              | Yaoundé |
| I7                               | Association leader             | National NGO                   | Yaoundé |
| I8                               | Association leader             | International NGO              | Paris   |
| I9                               | Program leader                 | International NGO              | Paris   |
| I10                              | Program manager                | International NGO              | Paris   |
| I11                              | Physician/ researcher          | International NGO              | Geneva  |
| I12                              | Communication leader           | International NGO              | Paris   |
| I13                              | Sale Representative            | Other (Pharmaceutical company) | Yaoundé |
| I14                              | Head of Publication            | Other (National Press)         | Yaoundé |
| <b>Health care professionals</b> |                                |                                |         |
| H1                               | Nurse                          | Public Hospital-1              | Yaoundé |
| H2                               | Nurse Major                    | Public Hospital-1              | Yaoundé |
| H3                               | Physician (gastroenterologist) | Public Hospital-1              | Yaoundé |
| H4                               | Physician (gastroenterologist) | Public Hospital-1              | Yaoundé |
| H5                               | Physician (gastroenterologist) | Private clinic                 | Yaoundé |
| H6                               | Physician (gastroenterologist) | Public Hospital- 2             | Yaoundé |
| H7                               | Physician (gastroenterologist) | Public Hospital -3             | Yaoundé |
| H8                               | Physician (gastroenterologist) | Public Hospital -3             | Yaoundé |
| H9                               | Physician (infectious disease) | Public Hospital- 1             | Yaoundé |
| H10                              | Physician (infectious disease) | Public Hospital-2              | Yaoundé |
| H11                              | Physician (infectious disease) | Public Hospital-2              | Yaoundé |
| H12                              | General Practitioner           | Public District Hospital       | Obala   |
| H13                              | Haematologist                  | Public Hospital -3             | Yaoundé |
| H14                              | Social worker                  | Public hospital-1              | Yaoundé |

# BMJ Open

## Screening, diagnosis and care cascade for viral hepatitis B and C in Yaoundé, Cameroon: a qualitative study of patients and health providers coping with uncertainty and unbearable costs

|                                 |                                                                                                                                                                                                                                                                                                                                                                                                                                                                      |
|---------------------------------|----------------------------------------------------------------------------------------------------------------------------------------------------------------------------------------------------------------------------------------------------------------------------------------------------------------------------------------------------------------------------------------------------------------------------------------------------------------------|
| Journal:                        | <i>BMJ Open</i>                                                                                                                                                                                                                                                                                                                                                                                                                                                      |
| Manuscript ID                   | bmjopen-2018-025415.R1                                                                                                                                                                                                                                                                                                                                                                                                                                               |
| Article Type:                   | Research                                                                                                                                                                                                                                                                                                                                                                                                                                                             |
| Date Submitted by the Author:   | 17-Dec-2018                                                                                                                                                                                                                                                                                                                                                                                                                                                          |
| Complete List of Authors:       | Chabrol, Fanny; French Institute for Research on Sustainable Development, CEPED<br>Noah Noah, Dominique; Hopital Central de Yaounde<br>Tchoumi, Eric Pascal; Hopital Central de Yaounde<br>Vidal, Laurent; French Institute for Research on sustainable Development, SESSTIM<br>Kuaban, Christopher; Faculty of Medicine and Biomedical sciences, University of Yaoundé 1<br>Carrieri, Maria Patrizia; SESSTIM<br>Boyer, Sylvie; SESSTIM; IHU Mediterranee Infection |
| <b>Primary Subject Heading</b>: | Qualitative research                                                                                                                                                                                                                                                                                                                                                                                                                                                 |
| Secondary Subject Heading:      | Gastroenterology and hepatology                                                                                                                                                                                                                                                                                                                                                                                                                                      |
| Keywords:                       | Viral hepatitis, Public health < INFECTIOUS DISEASES, Cameroon                                                                                                                                                                                                                                                                                                                                                                                                       |
|                                 |                                                                                                                                                                                                                                                                                                                                                                                                                                                                      |

SCHOLARONE™  
Manuscripts

**Manuscript.**

(Total word count without references and abstract = **5404**)

**Title:**

**Screening, diagnosis and care cascade for viral hepatitis B and C in Yaoundé, Cameroon: a qualitative study of patients and health providers coping with uncertainty and unbearable costs**

**Authors:**

**Fanny Chabrol<sup>1,3,§</sup>, Dominique Noah Noah<sup>2</sup>, Eric Pascal Tchoumi<sup>2</sup>, Laurent Vidal<sup>3</sup>, Christopher Kuaban<sup>4</sup>, Patrizia Carrieri<sup>4,5</sup>, Sylvie Boyer<sup>4,5</sup>, for the EVOLCam group\***

**Authors' affiliations:**

<sup>1</sup> Institute For Research on sustainable Development, (IRD), Centre Population et Développement (CEPED), Universités Paris Sorbonne Cités, ERL INSERM SAGESUD

<sup>2</sup> Gastroenterology Service, Hôpital Central de Yaoundé

<sup>3</sup> Aix Marseille Univ, INSERM, IRD, SESSTIM, Sciences Economiques & Sociales de la Santé & Traitement de l'Information Médicale, Marseille, France

<sup>4</sup> Department of Internal Medicine and Subspecialties, Faculty of Medicine and Biomedical Sciences, University of Yaoundé I, Yaoundé, Cameroon

<sup>5</sup> ORS PACA, Observatoire régional de la santé Provence Alpes Côte d'Azur, Marseille, France

\* The members of the EVOLCAM study group are listed in the acknowledgments

**§ Corresponding author**

Fanny Chabrol, PhD

Institute For Research on sustainable Development, (IRD), Centre Population et Développement (CEPED), Universités Paris Sorbonne Cités, ERL INSERM SAGESUD; 45 rue des saint Pères. 75006 Paris; Tel: + 33 01 76 53 34 71/50; [fanny.chabrol@ird.fr](mailto:fanny.chabrol@ird.fr)

**Keywords:** viral hepatitis B – viral hepatitis C – Cameroon – Qualitative study

## Abstract

**Objectives.** To document patients' and healthcare professionals' (HCP) experiences with HBV and HCV diagnosis and care, as well as consequences of these infections on patients' life trajectories in Cameroon, an endemic country in Sub-Saharan Africa.

**Design.** Qualitative sociological study combining in-depth interviews and observations of medical consultations. Interviews and observations transcripts were thematically analysed according to the following themes: circumstances and perceptions surrounding hepatitis screening, counselling and disclosure, information provided by HCP on hepatitis prevention and treatment, experience of access to care and treatment, social/economic trajectories after diagnosis.

**Setting:** HIV and gastroenterology/medical services in two reference public hospitals in Yaoundé (Cameroon).

**Participants.** 12 patients affected by HBV and/or HCV (co-infected or not with HIV), 14 HCP, 14 state and international stakeholders.

**Findings.** Many patients are screened for HBV and HCV at a time of great emotional and economic vulnerability. The information and counselling delivered after diagnosis is limited and patients report feeling alone, distressed, and unprepared to cope with their infection. After screening positive, patients struggle with out-of-pocket expenditures related to the large number of tests prescribed by physicians to assess disease stage and to decide whether treatment is needed. These costs are so exorbitant that many decide against clinical and biological follow-up. For those who do pay, the consequences on their social and economic life trajectories are catastrophic.

**Conclusion.** Large out-of-pocket expenditures related to biological follow-up and treatment pose a real challenge to receiving appropriate care. Free or reasonably-priced access to hepatitis B and C treatments can only be effective and efficient at reducing the hepatitis disease burden if the screening algorithm and the whole pre-therapeutic assessment package are simplified, standardized, and subsidized by comprehensive national policies orientated towards universal health care.

### Summary. Strengths and limitations of this study

- Challenges surrounding screening, diagnosis and care for viral hepatitis B and C in Cameroon were investigated comprehensively in terms of state and international stakeholders, healthcare professionals and patients.
- Our qualitative sociological study combined in-depth individual interviews with observations in gastroenterology wards in two of the study sites where HCP and patients were selected for participation.
- The qualitative design of the study is especially suitable to highlight how the complexity of the diagnostic and the high-related costs i) prevent most patients from accessing appropriate care and treatment, ii) detrimentally modify their social and economic life trajectories over the long term.
- This study was only conducted in Yaoundé and thus does not reflect what happens elsewhere in Cameroon, especially in rural areas and in other Sub-Saharan countries.
- Although this study was conducted before the arrival of Directly Acting Antivirals in Yaoundé, the challenges related to access to pre-therapeutic tests and to treatment are still relevant today.

## Introduction

According to the 2017 WHO Global hepatitis report [1], 257 million people are chronically affected by hepatitis B virus (HBV) and 71 million by hepatitis C virus (HCV) worldwide. Sub-Saharan Africa is one of the hotspots of these two epidemics. HBV infection is widespread in the continent, affecting more than 8% of the population in West and Central Africa, reaching 15% in some areas [2]. HCV infection is less evenly distributed with prevalences ranging from 1% in Senegal to 6.1% in Burkina Faso [3].

HBV and HCV are blood-borne infections but their main routes of transmission in Sub-Saharan Africa differ [4]. HBV is mainly transmitted at birth from mother to child (vertical transmission), during childhood through contact with infected blood (horizontal transmission) or through sexually (exchange of body fluids) or unsafe medical practices. HCV is mainly contracted parenterally through blood transfusion, unsafe medical practices and drug injection [5]. HBV and HCV disease progression leads to liver fibrosis, cirrhosis and hepatocellular carcinoma [6]. Antiviral treatments for HBV (e.g., Tenofovir®) and direct acting antivirals (DAA) for HCV can control viral replication, prevent disease-associated complications and even cure HCV [1]. Antiviral treatment for pregnant women living with chronic HBV infection is also required to prevent vertical transmission.

Viral hepatitis is a silent killer, long neglected in Sub-Saharan Africa [4]. Most countries in the region lack national hepatitis prevention and treatment programmes. Vaccination against HBV is included in immunisation programmes but coverage is poor [1]. Immunisation at birth, which is now recommended to reduce vertical transmission, has only been adopted in a few countries [7]. Screening is suboptimal and late diagnosis (i.e. when symptoms appear) is extremely frequent [4]. Moreover, the availability of effective antiviral treatments for HBV and DAA is very limited in most African health systems.

1  
2  
3 There is however a growing awareness about the global burden of viral hepatitis and  
4 its impact on communities' welfare. After the first resolution adopted in 2010 by the World  
5 Health Assembly which called for interventions for both prevention and control of viral  
6 hepatitis, the World Health Organization provided international guidelines for viral hepatitis  
7 screening and drew attention to this "urgent public health matter" [1], [8]. In addition,  
8 following the Dakar Call in July 2011 [9], healthcare professionals (HCP) in Africa advocated  
9 for mobilization to fight against viral hepatitis in the continent, and collaborations involving  
10 health professionals and societies of gastroenterologists continue to grow today.

11  
12  
13  
14  
15  
16  
17  
18  
19  
20  
21 Despite the complex challenges to Sub-Saharan HCP, patients, and health systems  
22 mentioned above, most of these challenges remain dramatically under-studied.  
23  
24 Comprehensive assessments of the circumstances and experiences of patients and HCP in  
25 terms of diagnosis, counselling and care for both diseases are sparse [10]–[12], especially in  
26 countries with poor access to related medical care. In this study, we aimed to document  
27 circumstances and perceptions surrounding HBV and HCV screening and counselling, and  
28 experiences with regard to access to care and treatment, and the impact these infections have  
29 on social and economic trajectories of patients in Yaoundé, the capital city of Cameroon.  
30  
31  
32  
33  
34  
35  
36  
37  
38  
39  
40  
41  
42

## 43 **Methods**

### 44 *Context*

45  
46  
47 Cameroon is a lower middle income country of Central Africa with a yearly gross  
48 domestic product (GDP) of 1354 USD per capita in 2015 and a literacy rate of 80% in young  
49 adults (15-24 years) [13]. However, human development indicators remain low: with a human  
50 development index of 0.55 in 2018, Cameroon is ranked 151 out of 188 countries, with 38%  
51 of the working population earning 3.10 USD (in purchasing power parity) per day or less  
52 [14]. The country's health system is mainly funded by private health expenditures through  
53  
54  
55  
56  
57  
58  
59  
60

1  
2  
3 out-of-pocket payments which represent approximately two-thirds of total health expenditures  
4 [15]. Social security expenditures on health represent only 2.6% of government health  
5 expenditure. In addition, safety nets for the poor are almost non-existent: theoretically,  
6 hospitals should have a social service to provide some financial support for the needy, but in  
7 reality there is no government funding for this service, and accordingly it is often  
8 dysfunctional.  
9

10  
11  
12  
13  
14  
15  
16  
17  
18 Two recent meta-analyses estimated HBV and HCV prevalence in Cameroon at 11.2%  
19 and 4.9%, respectively, in adults from the general population [3], [16]. The south-east region  
20 also has one of the largest iatrogenic HCV epidemics in people over 50 [17]. This explains  
21 discrepancies in estimations of HCV prevalence in the country which vary between 0.40 and  
22 55.88% according to subpopulation type, age group and geographical location [16].  
23  
24  
25  
26  
27  
28

29  
30  
31  
32  
33  
34  
35  
36  
37  
38  
39  
40  
41  
42  
43  
44  
45  
46  
47  
48  
49  
50  
51  
52  
53  
54  
55  
56  
57  
58  
59  
60  
Currently, Cameroon has no national viral hepatitis programme or national guidelines for screening, diagnosis, care and treatment. At the time of the present study, hepatitis testing was mainly proposed when patients presented with symptoms, or were diagnosed HIV-positive. Systematic HBV screening is recommended during antenatal care. In addition, screening for both diseases is compulsory to register for national competitive examinations for enrolment in the national police force and national school of administration. However, no specific education material on hepatitis and its prevention, care and treatment has been developed to help effectively carry out pre- and post-test counselling sessions. Specifically, no billboards were available in hospital services and, except for hepato-gastroenterologists, other HCP in general have not been trained in counselling on viral hepatitis. At the beginning of the 2010s, the Cameroon Society of Gastroenterology, comprising a dozen hepato-gastroenterologists, initiated a collaborative project with public health officials and researchers to promote access to hepatitis treatment. With respect to HBV infection, access to antiretroviral treatment (Tenofovir® or Lamivudine®) was initially only available within the

1  
2  
3 national HIV programme. Accordingly, only HIV-HBV coinfecting patients benefitted from it.  
4  
5 This policy changed in April 2014 when Tenofovir® prescription was allowed outside the  
6  
7 HIV programme at a price of 6.80 euros per month, but only in Douala's and Yaoundé's main  
8  
9 referral hospitals. For HCV infection, only interferon-based treatments were available in  
10  
11 2014. Eligibility committees set up in Yaoundé and Douala by the Ministry of Public Health  
12  
13 in August 2012 decided which patients could access treatment, at a cost to the latter of 7,500  
14  
15 euros and 11,200 euros (for 48 weeks and 72 weeks, respectively, depending on treatment  
16  
17 response), including a discount of 33% (increased to 50% in 2014) (See Table 1). Before  
18  
19 initiating treatment, patients had to complete a full pre-therapeutic assessment, which  
20  
21 included a large number of tests for a global cost of between 220 and 440€, depending on the  
22  
23 number and nature of the tests performed (see Table 1).  
24  
25  
26  
27  
28  
29  
30

### 31 *Study design*

32 We conducted a qualitative sociological study combining observations and in-depth  
33  
34 individual interviews conducted between April and September 2014, primarily in Yaoundé.  
35  
36 This study was part of the ANRS 12288-EVOLCAM cross-sectional mixed methods survey  
37  
38 which aimed to study current challenges faced by Cameroon's national antiretroviral  
39  
40 treatment programme in the care and treatment of major HIV co-infections, namely viral  
41  
42 hepatitis and tuberculosis [18].  
43  
44  
45  
46

### 47 *Data collection*

48 Individual in-depth interviews targeted three main categories of individuals who were  
49  
50 invited to participate in the study: i) key stakeholders involved in the care and treatment of  
51  
52 hepatitis, both at the national and international levels, including senior ministry of health  
53  
54 officials and leaders of international NGO, ii) HCP, mainly gastroenterologists working in  
55  
56 infectious disease departments and involved in the consultation of patients affected by viral  
57  
58  
59  
60



1  
2  
3 hepatitis in three reference hospitals of Yaoundé (Hôpital Central, Hôpital Général and  
4  
5 CHU), one private clinic in Yaoundé, and one district hospital near Yaoundé; iii) patients  
6  
7 consulting for hepatitis-related symptoms in two of these five facilities (Hôpital Central and  
8  
9 Hôpital Général). In addition, observations to assess doctor-patient relationships were  
10  
11 conducted using during medical rounds in the gastroenterology ward or outpatient medical  
12  
13 consultation spaces of these two facilities. We used a non-standardized observation guide  
14  
15 which was drawn up after analyzing the data from a first series of observations. The main  
16  
17 items examined included time spent during the consultation, anamnesis, medical  
18  
19 examination, prescription, quality of doctor-patient exchanges, and patient participation in  
20  
21 the interaction. Observations of consultations in gastroenterology services were only carried  
22  
23 out at the Hospital Central while observations of HIV consultations were conducted in both  
24  
25  
26  
27  
28  
29 hospitals.

30  
31 Study participation was proposed to patients after their consultation. Those who  
32  
33 agreed to share their experiences and perceptions were contacted by phone to make an  
34  
35 appointment for an interview outside of the hospital, usually at their home. The following  
36  
37 themes were approached using a semi-structured guide: context of screening, quality of  
38  
39 information and counselling, experience of diagnosis, risk perceptions, disclosure related  
40  
41 issues, costs engaged after diagnosis and difficulties encountered in seeking care and  
42  
43 treatment. Interviews were repeated with some of the patients to obtain more insight into their  
44  
45 social life and experience with the infection.  
46  
47

48  
49 Before starting each interview, the purpose and implications of the study participation was  
50  
51 explained and consent for participation and audio-recording of the interviews was obtained.  
52  
53

54  
55 All interviews were conducted in French and audio-recorded. Information about current  
56  
57 health policies and the health system in relation to HBV and HCV, liver complications and  
58  
59 associated costs, was also collected through national and international reports and press.  
60

### ***Analysis***

We used a grounded theory approach to viral hepatitis management because it is recognised as a powerful tool to describe novel and poorly understood phenomena [19] and because it allowed the research team to adapt the interview and observation guides to new questions which emerged during data collection. Preliminary results were first discussed during two workshops with the qualitative researchers and then with the whole EVOLCAM team, in order to triangulate qualitative evidence with quantitative results and to incorporate new items into the data collection tools, if needed. Audio recordings of interviews and notes taken during observations were transcribed, analysed and coded manually. Codes were defined together with the research team around issues including accuracy of knowledge on hepatitis, amount and quality of information, health expenses, time between consultation and examinations, expectations of care, and reference to HIV programmes. Analysis of patients' and HCP interviews was performed using the same inductive method whereby analytical themes were generated by hypothesis and confirmed or re-evaluated by data collection. Textual analysis was then undertaken, identifying specific sub-themes through occurrences and recurrences and analysis of correlations.

### ***Patient and public involvement***

Patients were not involved in the development of the research question, the design, recruitment or implementation of this study. Results were disseminated to medical students and public health leaders during a public meeting in Yaoundé in November 2016.

## **Findings**

### ***Institutional stakeholders, experts and healthcare professionals***

In-depth interviews were conducted with 14 institutional stakeholders including 2 public health representatives from the Cameroon Health Ministry, 3 international experts and researchers, a total of 7 members of international and local NGO, 1 stakeholder from the media, and 1 stakeholder from a pharmaceutical company. We also interviewed 14 HCP as follows: two nurses, six gastroenterologists, three infectious disease specialists, one haematologist, one general practitioner and one social worker (Table 2).

### ***Patients***

A total of 16 interviews were conducted with 12 different patients aged between 24 and 65 years. Most (9/12) were women and all had been diagnosed with chronic hepatitis (Table 3): 5 with HBV, 1 with HCV, 3 with HBV and HIV and 3 with HCV and HIV. Interviews were repeated with three patients, while another patient was interviewed in the presence of her father and mother-in-law at their request. Patients typically had a low-middle class socioeconomic status, and lived in Yaoundé or its suburbs. Two were unemployed, 2 were students and 3 were retired. The other were employed as follows: 1 school teacher, 1 embroiderer, 1 street merchant, 1 pharmacy assistant, and 1 security guard). None earned more than the average national monthly salary (approximately 50€) and the majority had irregular income, as they worked in small businesses or relied on familial financial support.

### ***Observations in hospital wards***

A total of 52 consultations in HIV services and 82 consultations in the gastroenterology wards were observed. Of the latter, 49 dealt with a viral hepatitis-related condition: 16 patients were consulting because of symptoms, 12 following positive diagnosis after a blood donation, 8 during follow-up for another disease (HIV), 6 on their own initiative in anticipation of a

1  
2  
3 marriage or a national competitive exam, 5 following antenatal screening and 2 after a  
4  
5 screening campaign at their workplace.  
6  
7  
8  
9

### 10 *Screening occurring at an inopportune moment*

11 According to our observations, approximately 33% (16/49) of the consultations were related  
12  
13 to patients who discovered they had hepatitis after the onset of symptoms like long episodes  
14  
15 of fatigue or ascites (accumulation of fluid in the peritoneal cavity) and subsequent  
16  
17 investigations by a gastroenterologist. The second most common reason for consultation was  
18  
19 following diagnosis after blood donation: approximately 24% (12/49 consultations) had been  
20  
21 referred from the hospital blood bank where they were tested positive for either HBV or  
22  
23 HCV. In Cameroon, blood donations rely on “family replacement” whereby the hospitalized  
24  
25 patient’s closest relatives are responsible for obtaining blood at the blood bank. They can only  
26  
27 obtain this blood if they themselves donate their own blood to the bank. Accordingly, they are  
28  
29 tested for hepatitis at a particularly vulnerable emotional moment.  
30  
31  
32  
33  
34

35 It all started when my dad had an accident. If I hadn’t been asked to give blood I wouldn’t have known I  
36  
37 was sick (...). When I got back to the blood bank to fetch my results they said to me the results were not  
38  
39 good because she saw I was positive for hepatitis B. Well, it was a shock. (Interview, P1).

40 My daughter was unwell (...) Upon arrival at the hospital they noticed my child didn’t have enough  
41  
42 blood, that she was anaemic. We had to transfuse her (...) - They told me and I had to give blood, and so  
43  
44 I did an hepatitis test. That’s when I started to learn about hepatitis. I didn’t even.... I didn’t know this  
45  
46 term existed (Interview, P4).

47 In the two situations cited above, patients were not at all prepared for the shock  
48  
49 announcement of positive test results. This is likely to be at least partially due to the fact that  
50  
51 they were not part of a voluntary screening process, and therefore had not already shown  
52  
53 concern about their own status. Another frequent circumstance of hepatitis testing was in the  
54  
55 course of HIV follow-up. HIV-positive patients diagnosed with HBV infection could easily  
56  
57 benefit from antiretroviral treatment including Tenofovir. However, for those who discovered  
58  
59 they were HCV-positive, the impact of the announcement was dramatic: after having  
60

1  
2  
3 struggled with HIV infection, they felt condemned again, as evidenced by the reaction of one  
4  
5 HIV-HCV coinfecting woman:

6  
7  
8         So me, I'm simply going to die? (Interview P10).

9  
10 In addition, a non-negligible proportion of the patients (5/46) were consulting after HBV  
11  
12 diagnosis during antenatal care, a very destabilizing situation for future mothers given the  
13  
14 absence of standardized and accessible prophylactic measures in Cameroon to prevent  
15  
16 mother-to-child transmission. One physician stated:

17  
18  
19         In most hospitals screening is systematic among pregnant women but after that there's nothing! These  
20  
21 women are dumped on us and we're asked to take care of them. Those who can afford to pay, do so;  
22  
23 those who can't don't (Interview H4).

### 24 25 *Fragmented and contradictory counselling*

26  
27 When HCP informed patients about their testing positive or when they interpreted laboratory  
28  
29 results during consultation, few details were provided to the patients about hepatitis' modes of  
30  
31 transmission, risk factors, preventive measures and therapeutic options. In some situations,  
32  
33 the information given was alarming and even inaccurate, for example regarding the modes of  
34  
35 transmission of HBV:

36  
37  
38         The lab technician told me it was very, very, very contagious, that I have to be very careful because it  
39  
40 [hepatitis B] is transmitted through sweat (Interview P1).

41  
42 Moreover, information was often contradictory, especially regarding how serious hepatitis  
43  
44 infection can be. Patients were also disappointed with the lack of communication with  
45  
46 healthcare professionals who, in their opinion, did not dedicate enough time to explain the  
47  
48 infection and its evolution.

49  
50         I'd like someone to explain my result to me, that I'm at this stage or that stage, but no one's ever told  
51  
52 me (Interview P5).

53  
54 As a result, patient knowledge was usually incomplete: they only had piecemeal information  
55  
56 gathered or remembered from their own experiences or from those of their close kin and  
57  
58 friends, and from the radio. The absence of standardized information guidelines and lack of  
59  
60

1  
2  
3 medical communication led to a very negative and worrying representation of life with the  
4  
5 virus as well as a very dark prognosis.  
6  
7

8 I was always told it's a virus with no symptoms and that it always kicks in at the terminal stage; when it  
9 hits, maybe it's "hello death" (Interview P1)

10 Prevention campaigns and radio broadcasts tended to encourage this image with the aim of  
11  
12 attracting patients to testing campaign sites.  
13  
14

15  
16 On hepatitis day, on the radio they talked about how to get tested, that's when I understood. They talked  
17 about how you get the disease and that you have to go to the centre and get tested... go to the hospital,  
18 but that takes time. People say that it's a very risky disease, that it kills you....it kills for sure, it kills  
19 silently, that's what people say (Interview P5).

### 20 21 ***Moral and social destabilization***

#### 22 Stress about infection and its evolution

23  
24  
25  
26 When patients learned of their hepatitis infection, they experienced great stress, manifested  
27 through anxiety. During medical consultations, as well as in interviews afterwards, patients  
28  
29 were very affected at a psychological level, as shown in this quotation from a young man:  
30  
31  
32

33  
34 Honestly I am terrified by this situation (...) Just knowing you have it makes you sick. When you  
35 already know you have it, you can't think anymore that you're in good health (Interview P1).

36 Patients were particularly worried about the evolution of their infection, wondering what they  
37  
38 could expect and whether treatment was available.  
39  
40

41  
42 When I discovered I had hepatitis I thought about going for treatment. Then I understood that you have  
43 to be sick before you can take remedies. I often wonder when I'm going to become sick, at what age.  
44 For now, I try not to contaminate other people (Interview P2).

45 I only want someone to tell me how I can treat this (Interview P10).

46 This strongly contrasted with the experience of HIV-HBV coinfecting persons who were on an  
47  
48 antiretroviral treatment that controls both infections. The great majority of patients considered  
49  
50 the worst-case scenario and foresaw a fatal outcome.  
51  
52

53  
54 When the level [of the virus] isn't high, you can be treated, but when you've already got a high level,  
55 it's difficult... you're already on the way to dying (...) When it's attacked the liver and eaten it away,  
56 what are you going to treat? (Interview father of P3).  
57  
58  
59  
60

### Fear about contaminating others

Patients were very anxious about the likelihood of contaminating close relatives. During consultations, the possibility of testing and vaccinating partners and family members and the means of prevention in general were rarely discussed, thereby increasing patient anxiety about virus transmission and the best preventive behaviours to adopt.

I suffer so bad when I think I can contaminate someone. It makes me suffer a lot and so I wonder how I can take precautions (Interview P1)

Due to a lack of appropriate information, patients modified their daily routines and took many restrictive precautions:

When I drink water, I hide the bottle, so that no one can drink after me (Interview P2)

One patient explained the various precautions he took to avoid sharing meals with his family and friends, while another said that he no longer slept next to one family member for fear of contamination by sweating at night.

### Disclosure of infection

Disclosing one's infection to friends and family was a difficult issue for patients. However, why and how to disclose one's infection were rarely discussed during the medical consultation. Most of the time, disclosure was necessary to solicit moral and financial support. That said, it could also lead to being left alone:

I said to my fiancée, "you are free to go where you want". I wanted to see what she would do. She never came back (Interview P2).

### ***Catastrophic health expenditures***

#### Huge expenses with little perspective of treatment

Numerous tests, according to a complex algorithm, are prescribed to assess the stage of hepatitis infection and the degree of liver damage in order to decide upon the need of

1  
2  
3 treatment. In Cameroon, access to care and treatment depends on patients' capacity to pay for  
4  
5 these expensive tests, as most specialist physicians acknowledged:  
6  
7

8 Even if patients could afford treatment, patients still have to go through a very complex eligibility  
9 assessment comprising testing and confirmation, fibrotest for assessing fibrosis level and also  
10 assessment of inflammatory activity (Interview I1)

11 The speed with which patients get care depends on the head of the family's pocket (Interview H4)

12  
13 The problem we have with hepatitis B is the exorbitant cost of the assessment for patients, who are most  
14 often students and cannot afford to pay, so we can't follow them (Interview H3).  
15

16  
17 Given the exorbitant costs of tests (150-200 €), very few patients were able to perform the  
18  
19 entire pre-therapeutic check-up.  
20  
21

22 What worried me the most is that the doctor said this disease is almost incurable and that you'd need  
23 enormous amounts of money, like millions [of FCFA, i.e. thousands of euros]. So I said to myself 'ok  
24 well if it's like that, then I'll sit at home and wait for death' (Interview P10).  
25

26 Moreover, in order to correctly assess the disease stage, all these tests need to be performed at  
27  
28 about the same time. As patients need time to gather money, this is practically impossible.  
29  
30

### 31 32 Bifurcation of life trajectories

33 Patients were most often screened when their financial resources were already strained  
34  
35 because of health expenditures mobilized for a hospitalized family member or for themselves  
36  
37 and this additional bill had catastrophic consequences on their social and economic life  
38  
39 trajectories. They had to depend on the generosity of friends, their community, village  
40  
41 solidarity or *Tontines* (Informal Financial Sector associations). To gather money, family  
42  
43 solidarity came under great strain:  
44  
45

46  
47 I went crying to my older sisters. They gave me money to open a small business. I spent everything to  
48 pay for the exams. Now I am here with no money (...). If I had to rely on my husband, it'd be a waste of  
49 time (Interview P5)  
50

51 The social and economic destabilization of hepatitis diagnosis was especially hard felt by  
52  
53 patients starting a personal or professional project. One patient decided to cancel a wedding  
54  
55 while another postponed having a child. In the professional domain, one young man gave up  
56  
57  
58  
59  
60



1  
2  
3 on studying at university because he knew that family expenses had already been mobilized to  
4  
5 treat his father and therefore that he himself had to pay for his own future medical expenses.  
6  
7

8 It's not easy, I was shaken by that [*hepatitis diagnosis*] because I was told the treatment is so, so  
9 expensive. I understood that I had to find money and I realised that I couldn't think about school  
10 anymore. I wanted to start engineering school next year but when I saw that [*diagnosis*] my only  
11 thought was that I needed to find a way to take care of myself, so I thought about working in  
12 construction sites » (Interview P1).

13 A young professional embroider thought about selling his embroidery machine, his main  
14  
15 working tool, in order to gather money to pay for hospital fees. The same happened to a  
16  
17 mother of four children:  
18  
19

20 I wanted to start a dress-making business but the little money that I had was for school fees and for  
21 starting a business, and now I pay for health care. (Interview P5)

22  
23 HBV and HCV screening is compulsory to register for most national competitive entrance  
24  
25 examinations. A positive diagnosis usually implies ineligibility, and thus a sudden and  
26  
27 complete change in one's life project.  
28  
29  
30  
31

### 32 Therapeutic dead-end: distress and powerlessness

33 Recently diagnosed patients did not have access to treatment, even after finishing the pre-  
34  
35 therapeutic assessment. Moreover, exorbitant test costs, the costs of treatment - especially for  
36  
37 HCV – were financially unbearable for the large majority of patients. Most health  
38  
39 professionals and public health managers denounced this situation as unfair, as it produced a  
40  
41 form of triage, as acknowledged by this physician:  
42  
43  
44  
45

46 Only a few people benefit from insurance schemes - like civil servants, or people whose employers  
47 have an insurance scheme - and have access to this programme [for pre-therapeutic assessment], but  
48 they still have to pay for the injections (Interview I1).

49 The distress generated by this therapeutic dead-end was shared by patients and HCP alike.  
50  
51 Doctors and families were outraged as sick patients hospitalized for pathologies associated  
52  
53 with viral hepatitis, such as liver cancer and cirrhosis, have a very poor prognosis.  
54

55 It hurts when we see these young persons who are dying, when they arrive all we are left with are our  
56 eyes to cry (Interview H3).

57 There was also a lack of palliative care and pain management due to insufficient equipment  
58  
59 and human resources.  
60

1  
2  
3 In my opinion, hepatitis care today for middle-income people... we lose them [i.e., they die]... they only  
4 come when they already have complications... we lose almost all of them (Interview H1).

5 Because they felt they would not receive a concrete response from hospital services, many  
6  
7 patients sought relief through traditional or “indigenous” medicine, which is comparatively  
8  
9 less costly:  
10  
11

12  
13 You see, in Africa we say that people really like going for traditional medicine because with say  
14 100,000 FCFA (152 €), you get traditional treatment. But with modern medicine, like, an exam costs  
15 200,000 FCFA (305 €), that means you need another 200,000 FCFA even before starting treatment...  
16 and that’s impossible if you haven’t already put it away somewhere (Interview father of P3).

17 Here a patient has no other option but to go back to the village (neighbourhood) and leave it up to  
18 traditional medicine (Interview P4)

19 Most patients interviewed truly appreciated and recognized the value of traditional medicine,  
20  
21 especially its ability to alleviate the fatigue and pain associated with viral hepatitis infection.  
22  
23

24 They also praised the quality of care and attentiveness provided by traditional healers.  
25  
26

27 I'm not the type to tremble when someone tells me something. I shook once and my husband supported  
28 me ... today I don't have any more problems, no matter what they tell me, I try to manage according to  
29 my means and if that doesn't work, I just let it go, and from time to time there are also little pieces of  
30 bark [traditional medicine] from home that also have their value, which we take from time to time  
31 (Interview P10).  
32  
33  
34

## 35 Discussion

36 This is the first study to explore contexts, experiences and perspectives of both  
37  
38 healthcare professionals and patients regarding hepatitis screening, care and treatment in  
39  
40 Yaoundé, Cameroon, where HBV and HCV are endemic. Our findings demonstrated that in  
41  
42 this setting, hepatitis screening does not necessarily translate into access to care and  
43  
44 treatment, mainly because of unaffordable related costs. Four major challenges to screening  
45  
46 and diagnosing hepatitis B and hepatitis C emerged from the patients’ and HCP interviews.  
47  
48 First, very often, hepatitis infection is discovered in difficult circumstances, when patients  
49  
50 have already started to experience diseases symptoms or following a blood donation for a  
51  
52 hospitalized family member. In both situations, the cumulative emotional and financial  
53  
54 difficulties hamper patients from making sense of the diagnosis. Second, patients are not  
55  
56 provided adequate information or counselling on risk factors and preventive measures  
57  
58  
59  
60

1  
2  
3 including vaccination of relatives. This results in inadequate and stigmatising prevention  
4  
5 practices, both from an epidemiological and clinical point of view. Little information and  
6  
7 counselling about the chronic nature and severity of their disease and about treatment options  
8  
9 also strongly affected patients psychologically. Third, in Cameroon, a positive diagnosis  
10  
11 immediately leads to enormous out-of-pocket (OOP) expenditures related to the pre-  
12  
13 therapeutic check-up, which is prescribed to assess the disease stage and decide whether  
14  
15 treatment is needed. These tests cost between 220 to 440 euros i.e., approximately 2 to 4 times  
16  
17 the monthly Cameroonian per-capita gross domestic product [18], and are therefore  
18  
19 considered catastrophic healthcare expenditures, likely to severely affect household welfare  
20  
21 and push patients and their household into poverty [20], [21]. These OOP expenditures are  
22  
23 insurmountable barriers to accessing treatment, except for HIV-HBV coinfecting patients  
24  
25 whose antiretroviral treatment (Tenofovir) is also effective for HBV. Fourth, diagnosis of  
26  
27 chronic hepatitis not only translates into having to cope with an infection, it also produces a  
28  
29 rupture in a person's life trajectory. In this study, most patients interviewed were  
30  
31 representative of the lower-middle socioeconomic class in Yaoundé: their income was  
32  
33 irregular, coming from activities in the informal sector, and they had no health insurance. The  
34  
35 out-of-pocket expenditures required to perform pre-therapeutic assessments were so high that  
36  
37 they had detrimental consequences on all their life projects, like weddings, child bearing,  
38  
39 education and business development. They also contributed to increase the patients' social  
40  
41 dependence and economic vulnerability, many risking poverty and debt, and being obliged to  
42  
43 sell their assets and/or to rely on the financial support of their social network.  
44  
45  
46  
47  
48  
49  
50

51 Our study corroborates the results of other studies in Sub-Saharan Africa pointing to  
52  
53 serious patient destabilisation associated with HBV diagnosis, inability to pay for medical  
54  
55 care and feelings of injustice [11]. However, the impact of HBV and HCV on life trajectories  
56  
57 have rarely been documented in qualitative studies, which mainly focus on patients'  
58  
59  
60

1  
2  
3 representations and experiences of HBV infection [11], on obstacles to linkage to care after  
4 diagnosis of HBV [12] and on access to HCV treatment [10]. In line with studies on linkage  
5 to care [4] [12], we identified large barriers for patients diagnosed with HBV or HCV, mainly  
6 at the structural level, including i) a lack of adequate training of HCP which resulted in  
7 frequent misconceptions about transmission, natural history and diagnosis, ii) a lack of  
8 simple, reliable, and low-cost diagnostic tests and iii) a lack of funding allocated to the fight  
9 against hepatitis, which resulted in unaffordable user fees for prevention, care and treatment.  
10 In contrast with other diseases such as HIV, TB or malaria, where international funding led to  
11 the expansion of prevention and care in low-resource settings, there is currently no financial  
12 mechanism dedicated to supporting prevention and treatment of viral hepatitis in these  
13 settings. Considering the size of the financial barrier to care and treatment access, this calls  
14 for a multilateral commitment from governments, funders, pharmaceutical firms, researchers  
15 and patient communities [22]. More specifically, our results highlight the urgent need for a  
16 comprehensive national programme in Cameroon for the screening, care and treatment of  
17 HBV and HCV. Screening uptake and access to a subsidized pre-therapeutic package could be  
18 enhanced through technological innovations and point-of-care devices which may improve  
19 both geographical and financial accessibility, especially thanks to reduced indirect costs  
20 related to transport [23], [24]. To reach this goal, national health authorities should rely on  
21 WHO guidelines on hepatitis B and C testing which propose simplified algorithms which are  
22 easy to implement [25], as well on recent WHO recommendations for the screening, care and  
23 treatment of chronic hepatitis B and C infections [26], [27].

24  
25  
26  
27  
28  
29  
30  
31  
32  
33  
34  
35  
36  
37  
38  
39  
40  
41  
42  
43  
44  
45  
46  
47  
48  
49  
50  
51  
52  
53  
54  
55  
56  
57  
58  
59  
60

Lessons from HIV should also be drawn to improve access to treatment, especially by using low-cost generic drugs and promoting subsidized treatment. While HBV treatment is currently relatively financially accessible, costing between 5.10 to 6.80 euros per month, we recommend free access for mono-HBV patients, as user fees reduce adherence and treatment

1  
2  
3 effectiveness, something already demonstrated for HIV [28], [29]. With respect to HCV  
4  
5 treatment, the large decrease in prices obtained recently for DAA with the arrival of generic  
6  
7 drugs have led to those treatments becoming very cost-effective in Cameroon [30]. However,  
8  
9 at current prices (approximately 580-600 euros for a 12-week Sofosbuvir-based regimen)[31],  
10  
11 they will remain inaccessible for the large majority of the population if they are not  
12  
13 subsidized.  
14  
15

16  
17 This study has limitations. It was only conducted in Yaoundé and thus does not reflect  
18  
19 what happens elsewhere in Cameroon, especially in rural areas. However, we can hypothesize  
20  
21 that challenges to care access are even more severe there, as most specialists including  
22  
23 gastroenterologists are located in Yaoundé and in Douala. In addition, the study took place in  
24  
25 2014 before the 2016 announcement by the Cameroonian ministry of Health about the  
26  
27 availability of DAA [32]. Since then, DAA costs have substantially decreased. However, as  
28  
29 previously seen, challenges related to access to pre-therapeutic tests and to treatment are still  
30  
31 relevant today given that current treatment prices are still far above the financial capacity of  
32  
33 the population.  
34  
35  
36  
37  
38  
39

40 **Conclusion.** Free or reasonably-priced access to hepatitis B and C treatments in Cameroon  
41  
42 can only be effective and efficient at reducing the hepatitis disease burden, if the screening  
43  
44 algorithm and the whole package of pre-therapeutic check-up are i) simplified and  
45  
46 standardized in accordance with WHO guidelines [26], [27], ii) subsidized by national  
47  
48 comprehensive policies orientated towards universal health care. Our results are in line with  
49  
50 the Sustainable Development Goals.  
51  
52  
53  
54  
55

#### 56 **Contributors**

57  
58 FC, DNN, PET participated in the collection of data. FC and SB were responsible for data analysis  
59  
60 and interpretation of results and FC wrote the first draft of the manuscript. SB, PC, DNN, CK and LV

1  
2  
3 contributed to reviewing the manuscript. SB, LV and CK were involved in the design and  
4  
5 implementation of the ANRS EVOLCam survey. CK and LV were the principal investigators of the  
6  
7 survey. All authors approved the final version of the manuscript. All authors had full access to all of  
8  
9 the data in the study and take responsibility for the integrity of this data, as well as the accuracy of the  
10  
11 data analysis.  
12  
13

### 14 15 **Funding**

16  
17 This study was financially supported by the French National Agency for Research on AIDS and viral  
18  
19 hepatitis (ANRS), and a postdoctoral grant from Sidaction and the study was approved by the  
20  
21 Cameroonian Ministry of Public Health.  
22  
23

### 24 25 **Competing interests**

26  
27 None declared.  
28  
29

### 30 31 **Ethics approval**

32  
33 The Ethics Review Board of the Ministry of Public Health of Cameroon granted ethical approval for  
34  
35 this study. Patients and health professionals gave informed consent prior to interviews and  
36  
37 observations.  
38  
39

### 40 41 **Data sharing statement**

42  
43 No additional data available.  
44  
45

### 46 47 **Acknowledgements**

48  
49 We thank all patients and HCP from several hospitals in Yaoundé who agreed to participate in the study.

50  
51 We also thank Jude Sweeney for revising and editing the English version of the manuscript.  
52  
53

54  
55 \*The EVOLCAM study group: C. Kuaban, L. Vidal (principal investigators); G. Maradan, A. Ambani, O. Ndalle,  
56  
57 P. Momo, C. Tong (field coordination team); S. Boyer, V. Boyer, L. March, M. Mora, L. Sagaon Teyssier, M. de  
58  
59 Sèze, B. Spire, M. Suzan Monti (UMR912 – SESTIM); C. Laurent, F. Liégeois, E. Delaporte, V. Boyer, S. Eymard  
60  
Duvornay (TransVIHMI); F. Chabrol, E. Kouakam, O. Ossanga, H. Essama Owona, C. Biloa, M.T. Mengue  
(UCAC); E. Mpoudi Ngolé (CREMER); P.J. Fouda, C. Kouanfack, H. Abessolo, N. Noumssi, M. Defo, H. Meli  
(Hôpital Central, Yaoundé); Z. Nanga, Y. Perfura, M.Ngo Tonye, O. Kouambo, U. Olinga, E Soh (Hôpital Jamot,  
Yaoundé); C. Ejangue, E. Njom Nlend, A. Simo Ndongo (Hôpital de la Caisse, Yaoundé); E Abeng Mbozo'o, M.

Mpoudi Ngole, N. Manga, C. Danwe, L. Ayangma, B. Taman (Hôpital Militaire, Yaoundé); E.C. Njitoyap Ndam, B. Fangam Molu, J. Meli, H. Hadja, J. Lindou (Hôpital Général, Yaoundé); J.M. Bob Oyono, S. Beke, (Hôpital Djoungolo, Yaoundé); D. Eloundou, G. Touko, (District Hospital, Sa'a); J.J. Ze, M. Fokoua, L. Ngum, C. Ewolo, C. Bondze (District Hospital, Obala); J.D. Ngan Bilong, D. S. Maninzou, A. Nono Toche (Hôpital St Luc, Mbalmayo); M. Tsoungi Akoa, P. Ateba, S. Abia (District Hospital, Mbalmayo); A. Gutierrez, R. Garcia, P. Thumerel (Catholic Health Centre, Bikop); E. Belley Priso, Y. Mapoure, A. Malongue, A.P. Meledie Ndjong, B. Mbatchou, J. Hachu, S. Ngwane (Hôpital Général, Douala); J. Dissongo, M. Mbangue, Ida Penda, H. Mossi, G. Tchatchoua, Yoyo Ngongang, C. Nouboue, I. Wandji, L. Ndalle, J. Djene (Hôpital Laquintinie, Douala); M.J. Gomez, A. Mafuta, M. Mgantcha (Catholic Hospital St Albert Legrand, Douala); E.H. Moby, M.C. Kuitcheu, A.L. Mawe, Ngam Engonwei (District Hospital, Bonassama); L.J. Bitang, M. Ndam, R.B. Pallawo, Issiakou Adamou, G. Temgoua (District Hospital, Deido); C. Ndjie Essaga, C. Tchimou, A. Yeffou, I. Ngo, H. Fokam, H. Nyemb (District Hospital, Nylon); L.R. Njock, S. Omgnesseck, E. Kamto, B. Takou (District Hospital, Edea); L.J.G Buffeteau, F. Ndoumbe, JD Noah, I. Seyep (Hôpital St Jean de Malte, Njombe).

## References

- [1] World Health Organization, « Global Hepatitis Report 2017 », WHO, Geneva, 2017.
- [2] A. Schweitzer, J. Horn, R. T. Mikolajczyk, G. Krause, and J. J. Ott, « Estimations of worldwide prevalence of chronic hepatitis B virus infection: a systematic review of data published between 1965 and 2013 », *The Lancet*, vol. 386, n° 10003, p. 1546–1555, 2015.
- [3] J. Riou, M. Aït Ahmed, A. Blake *et al.*, « Hepatitis C virus seroprevalence in adults in Africa: a systematic review and meta-analysis », *J Viral Hepat*, vol. 23, n° 4, p. 244-255, avr. 2016.
- [4] M. Lemoine, S. Eholié, and K. Lacombe, « Reducing the neglected burden of viral hepatitis in Africa: strategies for a global approach », *Journal of hepatology*, vol. 62, n° 2, p. 469–476, 2015.
- [5] J. Pépin and A. C. Labbé, « Noble goals, unforeseen consequences: control of tropical diseases in colonial Central Africa and the iatrogenic transmission of blood-borne viruses », *Tropical Medicine & International Health*, vol. 13, n° 6, p. 744-753, 2008.
- [6] M. Lemoine and M. R. Thursz, « Battlefield against hepatitis B infection and HCC in Africa », *Journal of Hepatology*, vol. 66, n° 3, p. 645-654, mars 2017.
- [7] L. Breakwell, C. Tevi-Benissan, L. Childs, R. Mihigo, and R. Tohme, « The status of hepatitis B control in the African region », *Pan Afr Med J*, vol. 27, n° Suppl 3, juin 2017.
- [8] World Health Organization, « Guidelines on hepatitis B and C testing », WHO, Geneva, February 2017.
- [9] Appel de Dakar, « Conférence internationale des acteurs de lutte contre les hépatites en Afrique francophone ». 26-juill-2011.
- [10] F. Chabrol, P.-M. David and G. Krikorian, « Rationing hepatitis C treatment in the context of austerity policies in France and Cameroon: A transnational perspective on the pharmaceuticalization of healthcare systems », *Social Science & Medicine*, vol. 187, p. 243-250, août 2017.
- [11] D. Pourette and C. Enel, « Représentations et vécu de l'hépatite B de patients subsahariens en Côte d'Ivoire et en France », *Santé Publique*, vol. 26, n° 6, p. 869-878, janv. 2015.
- [12] T. Giles-Vernick, F. Hejoaka, A. Sanou, Y. Shimakawa, I. Bamba, and A. Traoré, « Barriers to Linkage to Care for Hepatitis B Virus Infection: A Qualitative Analysis in Burkina Faso, West Africa », *The American Journal of Tropical Medicine and Hygiene*, vol. 95, n° 6, p. 1368–1375, 2016.
- [13] World Bank, « World Bank Open Data ». [On line]. <https://data.worldbank.org/>. [Accessed December 12th 2018].

- 1  
2  
3 [14] UNDP, « Human Development Reports. Cameroon profile ». [On line].  
4 <http://hdr.undp.org/en/countries/profiles/CMR>. [Accessed December 12th 2018].  
5 [15] WHO, « World Health Statistics 2015 ».  
6 [16] J. J. Bigna, M. A. Amougou, S. L. Asangbeh, A. M. Kenne, et J. R. Nansseu,  
7 « Seroprevalence of hepatitis C virus infection in Cameroon: a systematic review and meta-  
8 analysis », *BMJ Open*, vol. 7, n° 8, p. e015748, août 2017.  
9 [17] R. Njouom, E. Nerrienet, M. Dubois *et al.*, « The hepatitis C virus epidemic in  
10 Cameroon: genetic evidence for rapid transmission between 1920 and 1960 », *Infection,*  
11 *Genetics and Evolution*, vol. 7, n° 3, p. 361–367, 2007.  
12 [18] C. Tong, M. Suzan-Monti, L. Sagaon-Teyssier *et al.*, « Treatment interruption in HIV-  
13 positive patients followed up in Cameroon’s antiretroviral treatment programme: individual  
14 and health care supply-related factors (ANRS-12288 EVOLCam survey) », *Trop. Med. Int.*  
15 *Health*, vol. 23, n° 3, p. 315-326, mars 2018.  
16 [19] G. Foley and V. Timonen, « Using Grounded Theory Method to Capture and Analyze  
17 Health Care Experiences », *Health Serv Res*, vol. 50, n° 4, p. 1195-1210, août 2015.  
18 [20] WHO, « The world health report 2000 - Health systems: improving performance »,  
19 Geneva, 1999.  
20 [21] K. Xu, D. B. Evans, K. Kawabata, R. Zeramdini, J. Klavus, and C. J. Murray,  
21 « Household catastrophic health expenditure: a multicountry analysis », *The Lancet*, vol. 362,  
22 n° 9378, p. 111-117, juill. 2003.  
23 [22] M. Subic et F. Zoulim, « How to improve access to therapy in hepatitis B patients »,  
24 *Liver International*, vol. 38, n° S1, p. 115–121, 2018.  
25 [23] R. W. Peeling, D. I. Boeras, F. Marinucci, et P. Easterbrook, « The future of viral  
26 hepatitis testing: innovations in testing technologies and approaches », *BMC Infectious*  
27 *Diseases*, vol. 17, n° 1, p. 699, nov. 2017.  
28 [24] L. Duchesne and K. Lacombe, « Innovative technologies for point-of-care testing of  
29 viral hepatitis in low-resource and decentralized settings », *J. Viral Hepat.*, vol. 25, n° 2, p.  
30 108-117, févr. 2018.  
31 [25] WHO, « Guidelines on hepatitis B and C testing », Geneva, February. 2017.  
32 [26] WHO, « Guidelines for the prevention, care and treatment of persons with chronic  
33 hepatitis B infection », WHO, 2017. [On line]:  
34 <http://www.who.int/hepatitis/publications/hepatitis-b-guidelines/en/> [Accessed on December  
35 13<sup>th</sup> 2018].  
36 [27] WHO, « Guidelines for the care and treatment of persons diagnosed with chronic  
37 hepatitis C virus infection », Geneva, July 2018.  
38 [28] S. Boyer, F. Marcellin, P. Ongolo-Zoglo *et al.*, « Financial barriers to HIV treatment  
39 in Yaoundé, Cameroon: first results of a national cross-sectional survey », *Bulletin of the*  
40 *World Health Organization*, vol. 87, n° 4, p. 279–287, 2009.  
41 [29] E. J. Mills, J. B. Nachega, D. R. Bangsberg *et al.*, « Adherence to HAART: a  
42 systematic review of developed and developing nation patient-reported barriers and  
43 facilitators », *PLoS medicine*, vol. 3, n° 11, p. e438, 2006.  
44 [30] S. Boyer, « Cost-effectiveness of Sofosbuvir-Based Hepatitis C regimens in Central  
45 and West Africa (ANRS 12342) », présenté à EASL conference, mars-2018.  
46 [31] World Health Organization, « Progress report on access to hepatitis C treatment »,  
47 Geneva, mars 2018.  
48 [32] B. R. Tietcheu Galani, R. Njouom, et P. F. Moundipa, « Hepatitis C in Cameroon:  
49 What is the progress from 2001 to 2016? », *J Transl Int Med*, vol. 4, n° 4, p. 162-169, déc.  
50 2016.  
51  
52  
53  
54  
55  
56  
57  
58  
59  
60



## Tables

**Table 1. Prices of available for HBV and HCV screening and pre-therapeutic tests and treatment in 2014 in Yaoundé, Cameroon**

| Tests or treatment                                      | Unit Price (in euros) | Source                                   |
|---------------------------------------------------------|-----------------------|------------------------------------------|
| <b>Hepatitis B</b>                                      |                       |                                          |
| <i>Screening and pre-therapeutic assessment</i>         |                       |                                          |
| HBs Antigene*                                           | 13.9                  | Centre Pasteur Yaoundé (CPC)             |
| Anti HBc antibodies*                                    | 13.9                  | CPC                                      |
| Anti HBs antibodies*                                    | 13.9                  | CPC                                      |
| HBe Antigene*                                           | 13.9                  | CPC                                      |
| Ag HBe antibodies*                                      | 13.9                  | CPC                                      |
| Transaminases AST/ALT*                                  | 10.3                  | CPC                                      |
| Num NFS*                                                | 5.9                   | CPC                                      |
| Albumin*                                                | 5.5                   | CPC                                      |
| Biliburin*                                              | 3.0                   | CPC                                      |
| DNA hepatitis B (PCR) viral load*                       | 69.4                  | CPC                                      |
| Gamma-GT (glutamyl-transpeptidases)*                    | 3.2                   | CPC                                      |
| HIV serology*                                           | 13.9                  | CPC                                      |
| Hepatitis delta*                                        | 29.7                  | CPC                                      |
| Hepatic ultrasound*                                     | 12.2                  | Hospital 1                               |
| Fibrotest (not systematically prescribed)               | 135.7                 | CPC                                      |
| Electrophoresis protein (not systematically prescribed) | 83                    | CPC                                      |
| <b>TOTAL</b>                                            | <b>222.6 - 441.3</b>  |                                          |
| <b>Treatment</b>                                        |                       |                                          |
| Tenofovir 300 mg 30cp (monthly treatment)               | 6.8                   | Pharmacy of Hospital 2 (study data)      |
| Lamivudine 300 mg 30cp (monthly treatment)              | 5.1                   | Pharmacy of Hospital 2 (study data)      |
| <b>Hepatitis C</b>                                      |                       |                                          |
| <i>Screening and pre-therapeutic assessment</i>         |                       |                                          |
| Anti HCV antibodies*                                    | 13.9                  | Centre Pasteur Yaoundé                   |
| Transaminases AST/ALT*                                  | 10.3                  | CPC                                      |
| Num NFS*                                                | 5.9                   | CPC                                      |
| Viral load HCV*                                         | 69.3                  | CPC                                      |
| Gamma-GT (glutamyl-transpeptidases)*                    | 3.2                   | CPC                                      |
| Biliburin*                                              | 3.0                   | CPC                                      |
| Albumin*                                                | 5.5                   | CPC                                      |
| Genotyping (not systematically prescribed)              | 137                   | CPC                                      |
| Hepatic ultrasonound*                                   | 12.2                  | Hospital 1                               |
| Electrophoresis protein (not systematically prescribed) | 83                    | CPC                                      |
| Creatinine*                                             | 2.0                   | CPC                                      |
| <b>TOTAL</b>                                            | <b>125 - 345</b>      |                                          |
| <b>Treatment</b>                                        |                       |                                          |
| <i>Interferon-based treatments</i>                      |                       | <i>Roche Access program (study data)</i> |
| One injection (-30%)                                    | 155                   | Roche Access program (study data)        |
| One injection (-50%)                                    | 86                    | Roche Access program (study data)        |
| Full treatment 48 weeks                                 | 7,500                 | Roche Access program (study data)        |
| Full treatment 72 weeks                                 | 11,200                | Roche Access program (study data)        |

**Table 2. Information on institutional stakeholders and healthcare professionals who participated in the study's semi-structured interviews (N=28)**

|                                   | Position                       | Institution                    | City    |
|-----------------------------------|--------------------------------|--------------------------------|---------|
| <b>Institutional stakeholders</b> |                                |                                |         |
| I1                                | Physician (gastroenterologist) | Ministry of Health             | Yaoundé |
| I2                                | Public health officer          | Ministry of Health             | Yaoundé |
| I3                                | Hepatitis Programme Officer    | International Organization     | Geneva  |
| I4                                | Infectious Disease Researcher  | Public Health Research         | Yaoundé |
| I5                                | Virologist                     | Public Health Research         | Yaoundé |
| I6                                | Programme leader               | International NGO              | Yaoundé |
| I7                                | Association leader             | National NGO                   | Yaoundé |
| I8                                | Association leader             | International NGO              | Paris   |
| I9                                | Programme leader               | International NGO              | Paris   |
| I10                               | Programme manager              | International NGO              | Paris   |
| I11                               | Physician/ researcher          | International NGO              | Geneva  |
| I12                               | Communications leader          | International NGO              | Paris   |
| I13                               | Sales Representative           | Other (Pharmaceutical company) | Yaoundé |
| I14                               | Head of Publication            | Other (National Press)         | Yaoundé |
| <b>Healthcare professionals</b>   |                                |                                |         |
| H1                                | Nurse                          | Public Hospital-1              | Yaoundé |
| H2                                | Head Nurse                     | Public Hospital-1              | Yaoundé |
| H3                                | Physician (gastroenterologist) | Public Hospital-1              | Yaoundé |
| H4                                | Physician (gastroenterologist) | Public Hospital-1              | Yaoundé |
| H5                                | Physician (gastroenterologist) | Private clinic                 | Yaoundé |
| H6                                | Physician (gastroenterologist) | Public Hospital- 2             | Yaoundé |
| H7                                | Physician (gastroenterologist) | Public Hospital -3             | Yaoundé |
| H8                                | Physician (gastroenterologist) | Public Hospital -3             | Yaoundé |
| H9                                | Physician (infectious disease) | Public Hospital- 1             | Yaoundé |
| H10                               | Physician (infectious disease) | Public Hospital-2              | Yaoundé |
| H11                               | Physician (infectious disease) | Public Hospital-2              | Yaoundé |
| H12                               | General Practitioner           | Public District Hospital       | Obala   |
| H13                               | Haematologist                  | Public Hospital -3             | Yaoundé |
| H14                               | Social worker                  | Public hospital-1              | Yaoundé |

**Table 3. Information on patients who participated in the study's semi-structured interviews (N=12)**

| No  | S | Age range | Status  | Circumstances of screening  | Hospital | Living area | On treatment      |
|-----|---|-----------|---------|-----------------------------|----------|-------------|-------------------|
| P1  | M | 20-25     | HBV     | Blood donation              | H1       | Douala      | None              |
| P2  | M | 30-35     | HBV     | Symptoms                    | H1       | Yaoundé     | None              |
| P3  | F | 20-25     | HBV     | Antenatal care              | H1       | Yaoundé     | None              |
| P4  | F | 25-30     | HBV     | Blood donation              | H1       | Obala       | None              |
| P5  | F | 25-30     | HBV     | Antenatal care              | H1       | Yaoundé     | None              |
| P6  | F | 35-40     | HIV/HBV | Symptoms                    | H2       | Yaoundé     | HAART (Tenofovir) |
| P7  | M | 35-40     | HIV/HBV | Follow-up for HIV infection | H1       | Yaoundé     | HAART (Tenofovir) |
| P8  | F | 35-40     | HIV/HBV | Follow-up for HIV infection | H1       | Yaoundé     | HAART (Tenofovir) |
| P9  | F | 55-60     | HCV     | Check-up                    | H1       | Yaoundé     | None              |
| P10 | F | 35-40     | HIV/HCV | Follow-up for HIV infection | H1       | Adamaoua    | HAART             |
| P11 | F | 65-70     | HIV/HCV | Follow-up for HIV infection | H2       | Yaoundé     | HAART             |
| P12 | F | 55-60     | HIV/HCV | Follow-up for HIV infection | H1       | Yaoundé     | HAART             |

M=Male; F=Female; HAART= Highly Active Antiretroviral Treatment; H1= Hôpital central de Yaoundé; H2=Hôpital Général de Yaoundé

## Standards for Reporting Qualitative Research (SRQR)\*

<http://www.equator-network.org/reporting-guidelines/srqr/>

Page/line no(s).

### Title and abstract

|                                                                                                                                                                                                                                                              |               |
|--------------------------------------------------------------------------------------------------------------------------------------------------------------------------------------------------------------------------------------------------------------|---------------|
| <p><b>Title</b> - Concise description of the nature and topic of the study Identifying the study as qualitative or indicating the approach (e.g., ethnography, grounded theory) or data collection methods (e.g., interview, focus group) is recommended</p> | <p>page 1</p> |
| <p><b>Abstract</b> - Summary of key elements of the study using the abstract format of the intended publication; typically includes background, purpose, methods, results, and conclusions</p>                                                               | <p>page 2</p> |

### Introduction

|                                                                                                                                                                     |                                                   |
|---------------------------------------------------------------------------------------------------------------------------------------------------------------------|---------------------------------------------------|
| <p><b>Problem formulation</b> - Description and significance of the problem/phenomenon studied; review of relevant theory and empirical work; problem statement</p> | <p>page 3; last § and page 4 2<sup>nd</sup> §</p> |
| <p><b>Purpose or research question</b> - Purpose of the study and specific objectives or questions</p>                                                              | <p>page 2, 2<sup>nd</sup> §</p>                   |

### Methods

|                                                                                                                                                                                                                                                                                                                                                                                                             |                       |
|-------------------------------------------------------------------------------------------------------------------------------------------------------------------------------------------------------------------------------------------------------------------------------------------------------------------------------------------------------------------------------------------------------------|-----------------------|
| <p><b>Qualitative approach and research paradigm</b> - Qualitative approach (e.g., ethnography, grounded theory, case study, phenomenology, narrative research) and guiding theory if appropriate; identifying the research paradigm (e.g., postpositivist, constructivist/ interpretivist) is also recommended; rationale**</p>                                                                            | <p>page 8</p>         |
| <p><b>Researcher characteristics and reflexivity</b> - Researchers' characteristics that may influence the research, including personal attributes, qualifications/experience, relationship with participants, assumptions, and/or presuppositions; potential or actual interaction between researchers' characteristics and the research questions, approach, methods, results, and/or transferability</p> | <p>page 6</p>         |
| <p><b>Context</b> - Setting/site and salient contextual factors; rationale**</p>                                                                                                                                                                                                                                                                                                                            | <p>pages 4-5</p>      |
| <p><b>Sampling strategy</b> - How and why research participants, documents, or events were selected; criteria for deciding when no further sampling was necessary (e.g., sampling saturation); rationale**</p>                                                                                                                                                                                              | <p>page 7</p>         |
| <p><b>Ethical issues pertaining to human subjects</b> - Documentation of approval by an appropriate ethics review board and participant consent, or explanation for lack thereof; other confidentiality and data security issues</p>                                                                                                                                                                        | <p>page 7</p>         |
| <p><b>Data collection methods</b> - Types of data collected; details of data collection procedures including (as appropriate) start and stop dates of data collection and analysis, iterative process, triangulation of sources/methods, and modification of procedures in response to evolving study findings; rationale**</p>                                                                             | <p>page 6, last §</p> |

|                       |                                                                                                                                                                                                                                                       |        |
|-----------------------|-------------------------------------------------------------------------------------------------------------------------------------------------------------------------------------------------------------------------------------------------------|--------|
| 1<br>2<br>3<br>4<br>5 | <b>Data collection instruments and technologies</b> - Description of instruments (e.g., interview guides, questionnaires) and devices (e.g., audio recorders) used for data collection; if/how the instrument(s) changed over the course of the study | page 7 |
| 6<br>7<br>8           | <b>Units of study</b> - Number and relevant characteristics of participants, documents, or events included in the study; level of participation (could be reported in results)                                                                        | page 9 |
| 9<br>10<br>11<br>12   | <b>Data processing</b> - Methods for processing data prior to and during analysis, including transcription, data entry, data management and security, verification of data integrity, data coding, and anonymization/de-identification of excerpts    | page 8 |
| 13<br>14<br>15<br>16  | <b>Data analysis</b> - Process by which inferences, themes, etc., were identified and developed, including the researchers involved in data analysis; usually references a specific paradigm or approach; rationale**                                 | page 8 |
| 17<br>18<br>19<br>20  | <b>Techniques to enhance trustworthiness</b> - Techniques to enhance trustworthiness and credibility of data analysis (e.g., member checking, audit trail, triangulation); rationale**                                                                | page 8 |

## Results/findings

|                      |                                                                                                                                                                                                   |                    |
|----------------------|---------------------------------------------------------------------------------------------------------------------------------------------------------------------------------------------------|--------------------|
| 23<br>24<br>25<br>26 | <b>Synthesis and interpretation</b> - Main findings (e.g., interpretations, inferences, and themes); might include development of a theory or model, or integration with prior research or theory | page 10 to page 16 |
| 27<br>28<br>29       | <b>Links to empirical data</b> - Evidence (e.g., quotes, field notes, text excerpts, photographs) to substantiate analytic findings                                                               | page 10 to page 16 |

## Discussion

|                                        |                                                                                                                                                                                                                                                                                                                                                                                                             |                  |
|----------------------------------------|-------------------------------------------------------------------------------------------------------------------------------------------------------------------------------------------------------------------------------------------------------------------------------------------------------------------------------------------------------------------------------------------------------------|------------------|
| 32<br>33<br>34<br>35<br>36<br>37<br>38 | <b>Integration with prior work, implications, transferability, and contribution(s) to the field</b> - Short summary of main findings; explanation of how findings and conclusions connect to, support, elaborate on, or challenge conclusions of earlier scholarship; discussion of scope of application/generalizability; identification of unique contribution(s) to scholarship in a discipline or field | page 18          |
| 39                                     | <b>Limitations</b> - Trustworthiness and limitations of findings                                                                                                                                                                                                                                                                                                                                            | page 19, first § |

## Other

|                |                                                                                                                                               |         |
|----------------|-----------------------------------------------------------------------------------------------------------------------------------------------|---------|
| 42<br>43<br>44 | <b>Conflicts of interest</b> - Potential sources of influence or perceived influence on study conduct and conclusions; how these were managed | page 20 |
| 45<br>46       | <b>Funding</b> - Sources of funding and other support; role of funders in data collection, interpretation, and reporting                      | page 20 |

\*The authors created the SRQR by searching the literature to identify guidelines, reporting standards, and critical appraisal criteria for qualitative research; reviewing the reference lists of retrieved sources; and contacting experts to gain feedback. The SRQR aims to improve the transparency of all aspects of qualitative research by providing clear standards for reporting qualitative research.

1  
2  
3  
4  
5  
6  
7  
8  
9  
10  
11  
12  
13  
14  
15  
16  
17  
18  
19  
20  
21  
22  
23  
24  
25  
26  
27  
28  
29  
30  
31  
32  
33  
34  
35  
36  
37  
38  
39  
40  
41  
42  
43  
44  
45  
46  
47  
48  
49  
50  
51  
52  
53  
54  
55  
56  
57  
58  
59  
60

\*\*The rationale should briefly discuss the justification for choosing that theory, approach, method, or technique rather than other options available, the assumptions and limitations implicit in those choices, and how those choices influence study conclusions and transferability. As appropriate, the rationale for several items might be discussed together.

**Reference:**

O'Brien BC, Harris IB, Beckman TJ, Reed DA, Cook DA. **Standards for reporting qualitative research: a synthesis of recommendations.** *Academic Medicine*, Vol. 89, No. 9 / Sept 2014  
DOI: 10.1097/ACM.0000000000000388

For peer review only

# BMJ Open

## Screening, diagnosis and care cascade for viral hepatitis B and C in Yaoundé, Cameroon: a qualitative study of patients and health providers coping with uncertainty and unbearable costs

|                                 |                                                                                                                                                                                                                                                                                                                                                                                                                                                                      |
|---------------------------------|----------------------------------------------------------------------------------------------------------------------------------------------------------------------------------------------------------------------------------------------------------------------------------------------------------------------------------------------------------------------------------------------------------------------------------------------------------------------|
| Journal:                        | <i>BMJ Open</i>                                                                                                                                                                                                                                                                                                                                                                                                                                                      |
| Manuscript ID                   | bmjopen-2018-025415.R2                                                                                                                                                                                                                                                                                                                                                                                                                                               |
| Article Type:                   | Research                                                                                                                                                                                                                                                                                                                                                                                                                                                             |
| Date Submitted by the Author:   | 10-Jan-2019                                                                                                                                                                                                                                                                                                                                                                                                                                                          |
| Complete List of Authors:       | Chabrol, Fanny; French Institute for Research on Sustainable Development, CEPED<br>Noah Noah, Dominique; Hôpital central de Yaoundé<br>Tchoumi, Eric Pascal; Hôpital central de Yaoundé<br>Vidal, Laurent; French Institute for Research on sustainable Development, SESSTIM<br>Kuaban, Christopher; Faculty of Medicine and Biomedical sciences, University of Yaoundé 1<br>Carrieri, Maria Patrizia; SESSTIM<br>Boyer, Sylvie; SESSTIM; IHU Mediterranee Infection |
| <b>Primary Subject Heading</b>: | Qualitative research                                                                                                                                                                                                                                                                                                                                                                                                                                                 |
| Secondary Subject Heading:      | Gastroenterology and hepatology                                                                                                                                                                                                                                                                                                                                                                                                                                      |
| Keywords:                       | Viral hepatitis, Public health < INFECTIOUS DISEASES, Cameroon                                                                                                                                                                                                                                                                                                                                                                                                       |
|                                 |                                                                                                                                                                                                                                                                                                                                                                                                                                                                      |

SCHOLARONE™  
Manuscripts

**Manuscript.**

(Total word count without references and abstract = **5406**)

**Title:**

**Screening, diagnosis and care cascade for viral hepatitis B and C in Yaoundé, Cameroon: a qualitative study of patients and health providers coping with uncertainty and unbearable costs**

**Authors:**

**Fanny Chabrol<sup>1,3,§</sup>, Dominique Noah Noah<sup>2</sup>, Eric Pascal Tchoumi<sup>2</sup>, Laurent Vidal<sup>3</sup>, Christopher Kuaban<sup>4</sup>, Patrizia Carrieri<sup>3,5</sup>, Sylvie Boyer<sup>3</sup>, for the EVOLCam group\***

**Authors' affiliations:**

<sup>1</sup> Institute For Research on sustainable Development, (IRD), Centre Population et Développement (CEPED), Universités Paris Sorbonne Cités, ERL INSERM SAGESUD

<sup>2</sup> Gastroenterology Service, Hôpital Central de Yaoundé

<sup>3</sup> Aix Marseille Univ, INSERM, IRD, SESSTIM, Sciences Economiques & Sociales de la Santé & Traitement de l'Information Médicale, Marseille, France

<sup>4</sup> Department of Internal Medicine and Subspecialties, Faculty of Medicine and Biomedical Sciences, University of Yaoundé I, Yaoundé, Cameroon

<sup>5</sup> ORS PACA, Observatoire régional de la santé Provence Alpes Côte d'Azur, Marseille, France

\* The members of the EVOLCAM study group are listed in the acknowledgments

**§ Corresponding author**

Fanny Chabrol, PhD

Institute For Research on sustainable Development, (IRD), Centre Population et Développement (CEPED), Universités Paris Sorbonne Cités, ERL INSERM SAGESUD; 45 rue des saint Pères. 75006 Paris; Tel: + 33 01 76 53 34 71/50; [fanny.chabrol@ird.fr](mailto:fanny.chabrol@ird.fr)

**Keywords:** viral hepatitis B – viral hepatitis C – Cameroon – Qualitative study

## Abstract

**Objectives.** To document patients' and healthcare professionals' (HCP) experiences with HBV and HCV diagnosis and care, as well as consequences of these infections on patients' life trajectories in Cameroon, an endemic country in Sub-Saharan Africa.

**Design.** Qualitative sociological study combining in-depth interviews and observations of medical consultations. Interviews and observations transcripts were thematically analysed according to the following themes: circumstances and perceptions surrounding hepatitis screening, counselling and disclosure, information provided by HCP on hepatitis prevention and treatment, experience of access to care and treatment, social/economic trajectories after diagnosis.

**Setting:** HIV and gastroenterology/medical services in two reference public hospitals in Yaoundé (Cameroon).

**Participants.** 12 patients affected by HBV and/or HCV (co-infected or not with HIV), 14 HCP, 14 state and international stakeholders.

**Findings.** Many patients are screened for HBV and HCV at a time of great emotional and economic vulnerability. The information and counselling delivered after diagnosis is limited and patients report feeling alone, distressed, and unprepared to cope with their infection. After screening positive, patients struggle with out-of-pocket expenditures related to the large number of tests prescribed by physicians to assess disease stage and to decide whether treatment is needed. These costs are so exorbitant that many decide against clinical and biological follow-up. For those who do pay, the consequences on their social and economic life trajectories are catastrophic.

**Conclusion.** Large out-of-pocket expenditures related to biological follow-up and treatment pose a real challenge to receiving appropriate care. Free or reasonably-priced access to hepatitis B and C treatments can only be effective and efficient at reducing the hepatitis disease burden if the screening algorithm and the whole pre-therapeutic assessment package are simplified, standardized, and subsidized by comprehensive national policies orientated towards universal health care.

### Summary. Strengths and limitations of this study

- Challenges surrounding screening, diagnosis and care for viral hepatitis B and C in Cameroon were investigated comprehensively in terms of state and international stakeholders, healthcare professionals and patients.
- Our qualitative sociological study combined in-depth individual interviews with observations in gastroenterology wards in two of the study sites where HCP and patients were selected for participation.
- The qualitative design of the study is especially suitable to highlight how the complexity of the diagnostic and the high-related costs i) prevent most patients from accessing appropriate care and treatment, ii) detrimentally modify their social and economic life trajectories over the long term.
- This study was only conducted in Yaoundé and thus does not reflect what happens elsewhere in Cameroon, especially in rural areas and in other Sub-Saharan countries.
- Although this study was conducted before the arrival of Directly Acting Antivirals in Yaoundé, the challenges related to access to pre-therapeutic tests and to treatment are still relevant today.



## Introduction

According to the 2017 WHO Global hepatitis report [1], 257 million people are chronically affected by hepatitis B virus (HBV) and 71 million by hepatitis C virus (HCV) worldwide. Sub-Saharan Africa is one of the hotspots of these two epidemics. HBV infection is widespread in the continent, affecting more than 8% of the population in West and Central Africa, reaching 15% in some areas [2]. HCV infection is less evenly distributed with prevalences ranging from 1% in Senegal to 6.1% in Burkina Faso [3].

HBV and HCV are blood-borne infections but their main routes of transmission in Sub-Saharan Africa differ [4]. HBV is mainly transmitted at birth from mother to child (vertical transmission), during childhood through contact with infected blood (horizontal transmission) or through sexually (exchange of body fluids) or unsafe medical practices. HCV is mainly contracted parenterally through blood transfusion, unsafe medical practices and drug injection [5]. HBV and HCV disease progression leads to liver fibrosis, cirrhosis and hepatocellular carcinoma [6]. Antiviral treatments for HBV (e.g., Tenofovir®) and direct acting antivirals (DAA) for HCV can control viral replication, prevent disease-associated complications and even cure HCV [1]. Antiviral treatment for pregnant women living with chronic HBV infection is also required to prevent vertical transmission.

Viral hepatitis is a silent killer, long neglected in Sub-Saharan Africa [4]. Most countries in the region lack national hepatitis prevention and treatment programmes. Vaccination against HBV is included in immunisation programmes but coverage is poor [1]. Immunisation at birth, which is now recommended to reduce vertical transmission, has only been adopted in a few countries [7]. Screening is suboptimal and late diagnosis (i.e. when symptoms appear) is extremely frequent [4]. Moreover, the availability of effective antiviral treatments for HBV and DAA is very limited in most African health systems.

1  
2  
3 There is however a growing awareness about the global burden of viral hepatitis and  
4 its impact on communities' welfare. After the first resolution adopted in 2010 by the World  
5 Health Assembly which called for interventions for both prevention and control of viral  
6 hepatitis, the World Health Organization provided international guidelines for viral hepatitis  
7 screening and drew attention to this "urgent public health matter" [1], [8]. In addition,  
8 following the Dakar Call in July 2011 [9], healthcare professionals (HCP) in Africa advocated  
9 for mobilization to fight against viral hepatitis in the continent, and collaborations involving  
10 health professionals and societies of gastroenterologists continue to grow today.

11  
12  
13  
14  
15  
16  
17  
18  
19  
20  
21 Despite the complex challenges to Sub-Saharan HCP, patients, and health systems  
22 mentioned above, most of these challenges remain dramatically under-studied.  
23  
24 Comprehensive assessments of the circumstances and experiences of patients and HCP in  
25 terms of diagnosis, counselling and care for both diseases are sparse [10]–[12], especially in  
26 countries with poor access to related medical care. In this study, we aimed to document  
27 circumstances and perceptions surrounding HBV and HCV screening and counselling, and  
28 experiences with regard to access to care and treatment, and the impact these infections have  
29 on social and economic trajectories of patients in Yaoundé, the capital city of Cameroon.

## 30 31 32 33 34 35 36 37 38 39 40 41 42 43 **Methods**

### 44 45 46 47 *Context*

48 Cameroon is a lower middle income country of Central Africa with a yearly gross  
49 domestic product (GDP) of 1354 USD per capita in 2015 and a literacy rate of 80% in young  
50 adults (15-24 years) [13]. However, human development indicators remain low: with a human  
51 development index of 0.55 in 2018, Cameroon is ranked 151 out of 188 countries, with 38%  
52 of the working population earning 3.10 USD (in purchasing power parity) per day or less  
53 [14]. The country's health system is mainly funded by private health expenditures through  
54  
55  
56  
57  
58  
59  
60

1  
2  
3 out-of-pocket payments which represent approximately two-thirds of total health expenditures  
4 [15]. Social security expenditures on health represent only 2.6% of government health  
5 expenditure. In addition, safety nets for the poor are almost non-existent: theoretically,  
6 hospitals should have a social service to provide some financial support for the needy, but in  
7 reality there is no government funding for this service, and accordingly it is often  
8 dysfunctional.  
9  
10  
11  
12  
13  
14  
15  
16  
17

18 Two recent meta-analyses estimated HBV and HCV prevalence in Cameroon at 11.2%  
19 and 4.9%, respectively, in adults from the general population [3], [16]. The south-east region  
20 also has one of the largest iatrogenic HCV epidemics in people over 50 [17]. This explains  
21 discrepancies in estimations of HCV prevalence in the country which vary between 0.40 and  
22 55.88% according to subpopulation type, age group and geographical location [16].  
23  
24  
25  
26  
27  
28

29 Currently, Cameroon has no national viral hepatitis programme or national guidelines  
30 for screening, diagnosis, care and treatment. At the time of the present study, hepatitis testing  
31 was mainly proposed when patients presented with symptoms, or were diagnosed HIV-  
32 positive. Systematic HBV screening is recommended during antenatal care. In addition,  
33 screening for both diseases is compulsory to register for national competitive examinations  
34 for enrolment in the national police force and national school of administration. However, no  
35 specific education material on hepatitis and its prevention, care and treatment has been  
36 developed to help effectively carry out pre- and post-test counselling sessions. Specifically,  
37 no billboards were available in hospital services and, except for hepato-gastroenterologists,  
38 other HCP in general have not been trained in counselling on viral hepatitis. At the beginning  
39 of the 2010s, the Cameroon Society of Gastroenterology, comprising a dozen hepato-  
40 gastroenterologists, initiated a collaborative project with public health officials and  
41 researchers to promote access to hepatitis treatment. With respect to HBV infection, access to  
42 antiretroviral treatment (Tenofovir® or Lamivudine®) was initially only available within the  
43  
44  
45  
46  
47  
48  
49  
50  
51  
52  
53  
54  
55  
56  
57  
58  
59  
60

1  
2  
3 national HIV programme. Accordingly, only HIV-HBV coinfecting patients benefitted from it.  
4  
5 This policy changed in April 2014 when Tenofovir® prescription was allowed outside the  
6  
7 HIV programme at a price of 6.80 euros per month, but only in Douala's and Yaoundé's main  
8  
9 referral hospitals. For HCV infection, only interferon-based treatments were available in  
10  
11 2014. Eligibility committees set up in Yaoundé and Douala by the Ministry of Public Health  
12  
13 in August 2012 decided which patients could access treatment, at a cost to the latter of 7,500  
14  
15 euros and 11,200 euros (for 48 weeks and 72 weeks, respectively, depending on treatment  
16  
17 response), including a discount of 33% (increased to 50% in 2014) (See Table 1). Before  
18  
19 initiating treatment, patients had to complete a full pre-therapeutic assessment, which  
20  
21 included a large number of tests for a global cost of between 220 and 440€, depending on the  
22  
23 number and nature of the tests performed (see Table 1).  
24  
25  
26  
27  
28  
29  
30

### 31 *Study design*

32 We conducted a qualitative sociological study combining observations and in-depth  
33  
34 individual interviews conducted between April and September 2014, primarily in Yaoundé.  
35  
36 This study was part of the ANRS 12288-EVOLCAM cross-sectional mixed methods survey  
37  
38 which aimed to study current challenges faced by Cameroon's national antiretroviral  
39  
40 treatment programme in the care and treatment of major HIV co-infections, namely viral  
41  
42 hepatitis and tuberculosis [18].  
43  
44  
45  
46

### 47 *Data collection*

48 Individual in-depth interviews targeted three main categories of individuals who were  
49  
50 invited to participate in the study: i) key stakeholders involved in the care and treatment of  
51  
52 hepatitis, both at the national and international levels, including senior ministry of health  
53  
54 officials and leaders of international NGO, ii) HCP, mainly gastroenterologists working in  
55  
56 infectious disease departments and involved in the consultation of patients affected by viral  
57  
58  
59  
60

1  
2  
3 hepatitis in three reference hospitals of Yaoundé (Hôpital Central, Hôpital Général and  
4  
5 CHU), one private clinic in Yaoundé, and one district hospital near Yaoundé; iii) patients  
6  
7 consulting for hepatitis-related symptoms in two of these five facilities (Hôpital Central and  
8  
9 Hôpital Général). In addition, observations to assess doctor-patient relationships were  
10  
11 conducted during medical rounds in the gastroenterology ward or outpatient medical  
12  
13 consultation spaces of these two facilities. We used a non-standardized observation guide  
14  
15 which was drawn up after analyzing the data from a first series of observations. The main  
16  
17 items examined included time spent during the consultation, clinical history taking, medical  
18  
19 examination, prescription, quality of doctor-patient exchanges, and patient participation in  
20  
21 the interaction. Observations of consultations in gastroenterology services were only carried  
22  
23 out at the Hospital Central while observations of HIV consultations were conducted in both  
24  
25  
26  
27  
28  
29 hospitals.

30  
31 Study participation was proposed to patients after their consultation. Those who  
32  
33 agreed to share their experiences and perceptions were contacted by phone to make an  
34  
35 appointment for an interview outside of the hospital, usually at their home. The following  
36  
37 themes were approached using a semi-structured guide: context of screening, quality of  
38  
39 information and counselling, experience of diagnosis, risk perceptions, disclosure related  
40  
41 issues, costs engaged after diagnosis and difficulties encountered in seeking care and  
42  
43 treatment. Interviews were repeated with some of the patients to obtain more insight into their  
44  
45 social life and experience with the infection.  
46  
47  
48

49 Before starting each interview, the purpose and implications of the study participation  
50  
51 was explained and consent for participation and audio-recording of the interviews was  
52  
53 obtained. All interviews were conducted in French and audio-recorded. Information about  
54  
55 current health policies and the health system in relation to HBV and HCV, liver complications  
56  
57 and associated costs, was also collected through national and international reports and press.  
58  
59  
60

### ***Analysis***

We used a grounded theory approach to viral hepatitis management because it is recognised as a powerful tool to describe novel and poorly understood phenomena [19] and because it allowed the research team to adapt the interview and observation guides to new questions which emerged during data collection. Preliminary results were first discussed during two workshops with the qualitative researchers and then with the whole EVOLCAM team, in order to triangulate qualitative evidence with quantitative results and to incorporate new items into the data collection tools, if needed. Audio recordings of interviews and notes taken during observations were transcribed, analysed and coded manually. Codes were defined together with the research team around issues including accuracy of knowledge on hepatitis, amount and quality of information, health expenses, time between consultation and examinations, expectations of care, and reference to HIV programmes. Analysis of patients' and HCP interviews was performed using the same inductive method whereby analytical themes were generated by hypothesis and confirmed or re-evaluated by data collection. Textual analysis was then undertaken, identifying specific sub-themes through occurrences and recurrences and analysis of correlations.

### ***Patient and public involvement***

Patients were not involved in the development of the research question, the design, recruitment or implementation of this study. Results were disseminated to medical students and public health leaders during a public meeting in Yaoundé in November 2016.

## **Findings**

### ***Institutional stakeholders, experts and healthcare professionals***

In-depth interviews were conducted with 14 institutional stakeholders including 2 public health representatives from the Cameroon Health Ministry, 3 international experts and researchers, a total of 7 members of international and local NGO, 1 stakeholder from the media, and 1 stakeholder from a pharmaceutical company. We also interviewed 14 HCP as follows: two nurses, six gastroenterologists, three infectious disease specialists, one haematologist, one general practitioner and one social worker (Table 2).

### ***Patients***

A total of 16 interviews were conducted with 12 different patients aged between 24 and 65 years. Most (9/12) were women and all had been diagnosed with chronic hepatitis (Table 3): 5 with HBV, 1 with HCV, 3 with HBV and HIV and 3 with HCV and HIV. Interviews were repeated with three patients, while another patient was interviewed in the presence of her father and mother-in-law at their request. Patients typically had a low-middle class socioeconomic status, and lived in Yaoundé or its suburbs. Two were unemployed, 2 were students and 3 were retired. The others were employed as follows: 1 school teacher, 1 embroiderer, 1 street merchant, 1 pharmacy assistant, and 1 security guard). None earned more than the average national monthly salary (approximately 50€) and the majority had irregular income, as they worked in small businesses or relied on familial financial support.

### ***Observations in hospital wards***

A total of 52 consultations in HIV services and 82 consultations in the gastroenterology wards were observed. Of the latter, 49 dealt with a viral hepatitis-related condition: 16 patients were consulting because of symptoms, 12 following positive diagnosis after a blood donation, 8 during follow-up for another disease (HIV), 6 on their own initiative in anticipation of a

1  
2  
3 marriage or a national competitive exam, 5 following antenatal screening and 2 after a  
4  
5 screening campaign at their workplace.  
6  
7  
8  
9

### 10 *Screening occurring at an inopportune moment*

11 According to our observations, approximately 33% (16/49) of the consultations were related  
12  
13 to patients who discovered they had hepatitis after the onset of symptoms such as long  
14  
15 episodes of fatigue or ascites (accumulation of fluid in the peritoneal cavity) and subsequent  
16  
17 investigations by a gastroenterologist. The second most common reason for consultation was  
18  
19 following diagnosis after blood donation: approximately 24% (12/49 consultations) had been  
20  
21 referred from the hospital blood bank where they were tested positive for either HBV or  
22  
23 HCV. In Cameroon, blood donations rely on “family replacement” whereby the hospitalized  
24  
25 patient’s closest relatives are responsible for obtaining blood at the blood bank. They can only  
26  
27 obtain this blood if they themselves donate their own blood to the bank. Accordingly, they are  
28  
29 tested for hepatitis at a particularly vulnerable emotional moment.  
30  
31  
32  
33  
34

35 It all started when my dad had an accident. If I hadn’t been asked to give blood I wouldn’t have known I  
36  
37 was sick (...). When I got back to the blood bank to fetch my results they said to me the results were not  
38  
39 good because she saw I was positive for hepatitis B. Well, it was a shock. (Interview, P1).

40 My daughter was unwell (...) Upon arrival at the hospital they noticed my child didn’t have enough  
41  
42 blood, that she was anaemic. We had to transfuse her (...) - They told me and I had to give blood, and so  
43  
44 I did an hepatitis test. That’s when I started to learn about hepatitis. I didn’t even.... I didn’t know this  
45  
46 term existed (Interview, P4).

47 In the two situations cited above, patients were not at all prepared for the shock  
48  
49 announcement of positive test results. This is likely to be at least partially due to the fact that  
50  
51 they were not part of a voluntary screening process, and therefore had not already shown  
52  
53 concern about their own status. Another frequent circumstance of hepatitis testing was in the  
54  
55 course of HIV follow-up. HIV-positive patients diagnosed with HBV infection could easily  
56  
57 benefit from antiretroviral treatment including Tenofovir. However, for those who discovered  
58  
59 they were HCV-positive, the impact of the announcement was dramatic: after having  
60



1  
2  
3 struggled with HIV infection, they felt condemned again, as evidenced by the reaction of one  
4  
5 HIV-HCV coinfecting woman:

6  
7  
8         So me, I'm simply going to die? (Interview P10).

9  
10 In addition, a non-negligible proportion of the patients (5/46) were consulting after HBV  
11  
12 diagnosis during antenatal care, a very destabilizing situation for future mothers given the  
13  
14 absence of standardized and accessible prophylactic measures in Cameroon to prevent  
15  
16 mother-to-child transmission. One physician stated:

17  
18  
19         In most hospitals screening is systematic among pregnant women but after that there's nothing! These  
20  
21 women are dumped on us and we're asked to take care of them. Those who can afford to pay, do so;  
22  
23 those who can't don't (Interview H4).

### 24 25 *Fragmented and contradictory counselling*

26  
27 When HCP informed patients about their testing positive or when they interpreted laboratory  
28  
29 results during consultation, few details were provided to the patients about hepatitis' modes of  
30  
31 transmission, risk factors, preventive measures and therapeutic options. In some situations,  
32  
33 the information given was alarming and even inaccurate, for example regarding the modes of  
34  
35 transmission of HBV:

36  
37  
38         The lab technician told me it was very, very, very contagious, that I have to be very careful because it  
39  
40 [hepatitis B] is transmitted through sweat (Interview P1).

41  
42 Moreover, information was often contradictory, especially regarding how serious hepatitis  
43  
44 infection can be. Patients were also disappointed with the lack of communication with  
45  
46 healthcare professionals who, in their opinion, did not dedicate enough time to explain the  
47  
48 infection and its evolution.

49  
50         I'd like someone to explain my result to me, that I'm at this stage or that stage, but no one's ever told  
51  
52 me (Interview P5).

53  
54 As a result, patient knowledge was usually incomplete: they only had piecemeal information  
55  
56 gathered or remembered from their own experiences or from those of their close kin and  
57  
58 friends, and from the radio. The absence of standardized information guidelines and lack of  
59  
60

1  
2  
3 medical communication led to a very negative and worrying representation of life with the  
4  
5 virus as well as a very dark prognosis.  
6  
7

8 I was always told it's a virus with no symptoms and that it always kicks in at the terminal stage; when it  
9 hits, maybe it's "hello death" (Interview P1)

10 Prevention campaigns and radio broadcasts tended to encourage this image with the aim of  
11  
12 attracting patients to testing campaign sites.  
13  
14

15  
16 On hepatitis day, on the radio they talked about how to get tested, that's when I understood. They talked  
17 about how you get the disease and that you have to go to the centre and get tested... go to the hospital,  
18 but that takes time. People say that it's a very risky disease, that it kills you....it kills for sure, it kills  
19 silently, that's what people say (Interview P5).

### 20 21 22 ***Moral and social destabilization***

#### 23 24 25 Stress about infection and its evolution

26  
27 When patients learned of their hepatitis infection, they experienced great stress, manifested  
28  
29 through anxiety. During medical consultations, as well as in interviews afterwards, patients  
30  
31 were very affected at a psychological level, as shown in this quotation from a young man:  
32  
33

34 Honestly I am terrified by this situation (...) Just knowing you have it makes you sick. When you  
35 already know you have it, you can't think anymore that you're in good health (Interview P1).

36 Patients were particularly worried about the evolution of their infection, wondering what they  
37  
38 could expect and whether treatment was available.  
39  
40

41  
42 When I discovered I had hepatitis I thought about going for treatment. Then I understood that you have  
43 to be sick before you can take remedies. I often wonder when I'm going to become sick, at what age.  
44 For now, I try not to contaminate other people (Interview P2).

45 I only want someone to tell me how I can treat this (Interview P10).

46 This strongly contrasted with the experience of HIV-HBV coinfecting persons who were on an  
47  
48 antiretroviral treatment that controls both infections. The great majority of patients considered  
49  
50 the worst-case scenario and foresaw a fatal outcome.  
51  
52

53  
54 When the level [of the virus] isn't high, you can be treated, but when you've already got a high level,  
55 it's difficult... you're already on the way to dying (...) When it's attacked the liver and eaten it away,  
56 what are you going to treat? (Interview father of P3).  
57  
58  
59  
60

### Fear about contaminating others

Patients were very anxious about the likelihood of contaminating close relatives. During consultations, the possibility of testing and vaccinating partners and family members and the means of prevention in general were rarely discussed, thereby increasing patient anxiety about virus transmission and the best preventive behaviours to adopt.

I suffer so bad when I think I can contaminate someone. It makes me suffer a lot and so I wonder how I can take precautions (Interview P1)

Due to a lack of appropriate information, patients modified their daily routines and took many restrictive precautions:

When I drink water, I hide the bottle, so that no one can drink after me (Interview P2)

One patient explained the various precautions he took to avoid sharing meals with his family and friends, while another said that he no longer slept next to one family member for fear of contamination by sweating at night.

### Disclosure of infection

Disclosing one's infection to friends and family was a difficult issue for patients. However, why and how to disclose one's infection were rarely discussed during the medical consultation. Most of the time, disclosure was necessary to solicit moral and financial support. That said, it could also lead to being left alone:

I said to my fiancée, "you are free to go where you want". I wanted to see what she would do. She never came back (Interview P2).

### ***Catastrophic health expenditures***

#### Huge expenses with little perspective of treatment

Numerous tests, according to a complex algorithm, are prescribed to assess the stage of hepatitis infection and the degree of liver damage in order to decide upon the need of

1  
2  
3 treatment. In Cameroon, access to care and treatment depends on patients' capacity to pay for  
4  
5 these expensive tests, as most specialist physicians acknowledged:  
6  
7

8 Even if patients could afford treatment, patients still have to go through a very complex eligibility  
9 assessment comprising testing and confirmation, fibrotest for assessing fibrosis level and also  
10 assessment of inflammatory activity (Interview I1)

11 The speed with which patients get care depends on the head of the family's pocket (Interview H4)

12  
13 The problem we have with hepatitis B is the exorbitant cost of the assessment for patients, who are most  
14 often students and cannot afford to pay, so we can't follow them (Interview H3).  
15  
16

17 Given the exorbitant costs of tests (150-200 €), very few patients were able to perform the  
18  
19 entire pre-therapeutic check-up.  
20  
21

22 What worried me the most is that the doctor said this disease is almost incurable and that you'd need  
23 enormous amounts of money, like millions [of FCFA, i.e. thousands of euros]. So I said to myself 'ok  
24 well if it's like that, then I'll sit at home and wait for death' (Interview P10).  
25

26 Moreover, in order to correctly assess the disease stage, all these tests need to be performed at  
27  
28 about the same time. As patients need time to gather money, this is practically impossible.  
29  
30  
31

### 32 Bifurcation of life trajectories

33 Patients were most often screened when their financial resources were already strained  
34  
35 because of health expenditures mobilized for a hospitalized family member or for themselves  
36  
37 and this additional bill had catastrophic consequences on their social and economic life  
38  
39 trajectories. They had to depend on the generosity of friends, their community, village  
40  
41 solidarity or *Tontines* (Informal Financial Sector associations). To gather money, family  
42  
43 solidarity came under great strain:  
44  
45  
46  
47

48 I went crying to my older sisters. They gave me money to open a small business. I spent everything to  
49 pay for the exams. Now I am here with no money (...). If I had to rely on my husband, it'd be a waste of  
50 time (Interview P5)  
51

52 The social and economic destabilization of hepatitis diagnosis was especially hard felt by  
53  
54 patients starting a personal or professional project. One patient decided to cancel a wedding  
55  
56 while another postponed having a child. In the professional domain, one young man gave up  
57  
58  
59  
60

1  
2  
3 on studying at university because he knew that family expenses had already been mobilized to  
4  
5 treat his father and therefore that he himself had to pay for his own future medical expenses.  
6  
7

8 It's not easy, I was shaken by that [*hepatitis diagnosis*] because I was told the treatment is so, so  
9 expensive. I understood that I had to find money and I realised that I couldn't think about school  
10 anymore. I wanted to start engineering school next year but when I saw that [*diagnosis*] my only  
11 thought was that I needed to find a way to take care of myself, so I thought about working in  
12 construction sites » (Interview P1).

13 A young professional embroider thought about selling his embroidery machine, his main  
14 working tool, in order to gather money to pay for hospital fees. The same happened to a  
15  
16 mother of four children:  
17  
18

19  
20  
21 I wanted to start a dress-making business but the little money that I had was for school fees and for  
22 starting a business, and now I pay for health care. (Interview P5)

23 HBV and HCV screening is compulsory to register for most national competitive entrance  
24  
25 examinations. A positive diagnosis usually implies ineligibility, and thus a sudden and  
26  
27 complete change in one's life project.  
28  
29  
30  
31

### 32 Therapeutic dead-end: distress and powerlessness

33 Recently diagnosed patients did not have access to treatment, even after finishing the pre-  
34  
35 therapeutic assessment. Moreover, exorbitant test costs, the costs of treatment - especially for  
36  
37 HCV – were financially unbearable for the large majority of patients. Most health  
38  
39 professionals and public health managers denounced this situation as unfair, as it produced a  
40  
41 form of triage, as acknowledged by this physician:  
42  
43  
44  
45

46 Only a few people benefit from insurance schemes - like civil servants, or people whose employers  
47 have an insurance scheme - and have access to this programme [for pre-therapeutic assessment], but  
48 they still have to pay for the injections (Interview I1).

49 The distress generated by this therapeutic dead-end was shared by patients and HCP alike.  
50  
51 Doctors and families were outraged as sick patients hospitalized for pathologies associated  
52  
53 with viral hepatitis, such as liver cancer and cirrhosis, have a very poor prognosis.  
54

55 It hurts when we see these young persons who are dying, when they arrive all we are left with are our  
56 eyes to cry (Interview H3).

57 There was also a lack of palliative care and pain management due to insufficient equipment  
58  
59 and human resources.  
60

1  
2  
3 In my opinion, hepatitis care today for middle-income people... we lose them [i.e., they die]... they only  
4 come when they already have complications... we lose almost all of them (Interview H1).

5 Because they felt they would not receive a concrete response from hospital services, many  
6  
7 patients sought relief through traditional or “indigenous” medicine, which is comparatively  
8  
9 less costly:  
10  
11

12  
13 You see, in Africa we say that people really like going for traditional medicine because with say  
14 100,000 FCFA (152 €), you get traditional treatment. But with modern medicine, like, an exam costs  
15 200,000 FCFA (305 €), that means you need another 200,000 FCFA even before starting treatment...  
16 and that’s impossible if you haven’t already put it away somewhere (Interview father of P3).

17 Here a patient has no other option but to go back to the village (neighbourhood) and leave it up to  
18 traditional medicine (Interview P4)

19 Most patients interviewed truly appreciated and recognized the value of traditional medicine,  
20  
21 especially its ability to alleviate the fatigue and pain associated with viral hepatitis infection.  
22  
23

24 They also praised the quality of care and attentiveness provided by traditional healers.  
25  
26

27 I'm not the type to tremble when someone tells me something. I shook once and my husband supported  
28 me ... today I don't have any more problems, no matter what they tell me, I try to manage according to  
29 my means and if that doesn't work, I just let it go, and from time to time there are also little pieces of  
30 bark [traditional medicine] from home that also have their value, which we take from time to time  
31 (Interview P10).  
32  
33  
34

## 35 Discussion

36 This is the first study to explore contexts, experiences and perspectives of both  
37  
38 healthcare professionals and patients regarding hepatitis screening, care and treatment in  
39  
40 Yaoundé, Cameroon, where HBV and HCV are endemic. Our findings demonstrated that in  
41  
42 this setting, hepatitis screening does not necessarily translate into access to care and  
43  
44 treatment, mainly because of unaffordable related costs. Four major challenges to screening  
45  
46 and diagnosing hepatitis B and hepatitis C emerged from the patients’ and HCP interviews.  
47  
48 First, very often, hepatitis infection is discovered in difficult circumstances, when patients  
49  
50 have already started to experience diseases symptoms or following a blood donation for a  
51  
52 hospitalized family member. In both situations, the cumulative emotional and financial  
53  
54 difficulties hamper patients from making sense of the diagnosis. Second, patients are not  
55  
56 provided adequate information or counselling on risk factors and preventive measures  
57  
58  
59  
60

1  
2  
3 including vaccination of relatives. This results in inadequate and stigmatising prevention  
4  
5 practices, both from an epidemiological and clinical point of view. Little information and  
6  
7 counselling about the chronic nature and severity of their disease and about treatment options  
8  
9 also strongly affected patients psychologically. Third, in Cameroon, a positive diagnosis  
10  
11 immediately leads to enormous out-of-pocket (OOP) expenditures related to the pre-  
12  
13 therapeutic check-up, which is prescribed to assess the disease stage and decide whether  
14  
15 treatment is needed. These tests cost between 220 to 440 euros i.e., approximately 2 to 4 times  
16  
17 the monthly Cameroonian per-capita gross domestic product [18], and are therefore  
18  
19 considered catastrophic healthcare expenditures, likely to severely affect household welfare  
20  
21 and push patients and their household into poverty [20], [21]. These OOP expenditures are  
22  
23 insurmountable barriers to accessing treatment, except for HIV-HBV coinfecting patients  
24  
25 whose antiretroviral treatment (Tenofovir) is also effective for HBV. Fourth, diagnosis of  
26  
27 chronic hepatitis not only translates into having to cope with an infection, it also produces a  
28  
29 rupture in a person's life trajectory. In this study, most patients interviewed were  
30  
31 representative of the lower-middle socioeconomic class in Yaoundé: their income was  
32  
33 irregular, coming from activities in the informal sector, and they had no health insurance. The  
34  
35 out-of-pocket expenditures required to perform pre-therapeutic assessments were so high that  
36  
37 they had detrimental consequences on all their life projects, like weddings, child bearing,  
38  
39 education and business development. They also contributed to increase the patients' social  
40  
41 dependence and economic vulnerability, many risking poverty and debt, and being obliged to  
42  
43 sell their assets and/or to rely on the financial support of their social network.  
44  
45  
46  
47  
48  
49

50  
51 Our study corroborates the results of other studies in Sub-Saharan Africa pointing to  
52  
53 serious patient destabilisation associated with HBV diagnosis, inability to pay for medical  
54  
55 care and feelings of injustice [11]. However, the impact of HBV and HCV on life trajectories  
56  
57 have rarely been documented in qualitative studies, which mainly focus on patients'  
58  
59  
60

1  
2  
3 representations and experiences of HBV infection [11], on obstacles to linkage to care after  
4 diagnosis of HBV [12] and on access to HCV treatment [10]. In line with studies on linkage  
5 to care [4] [12], we identified large barriers for patients diagnosed with HBV or HCV, mainly  
6 at the structural level, including i) a lack of adequate training of HCP which resulted in  
7 frequent misconceptions about transmission, natural history and diagnosis, ii) a lack of  
8 simple, reliable, and low-cost diagnostic tests and iii) a lack of funding allocated to the fight  
9 against hepatitis, which resulted in unaffordable user fees for prevention, care and treatment.  
10 In contrast with other diseases such as HIV, TB or malaria, where international funding led to  
11 the expansion of prevention and care in low-resource settings, there is currently no financial  
12 mechanism dedicated to supporting prevention and treatment of viral hepatitis in these  
13 settings. Considering the size of the financial barrier to care and treatment access, this calls  
14 for a multilateral commitment from governments, funders, pharmaceutical firms, researchers  
15 and patient communities [22]. More specifically, our results highlight the urgent need for a  
16 comprehensive national programme in Cameroon for the screening, care and treatment of  
17 HBV and HCV. Screening uptake and access to a subsidized pre-therapeutic package could be  
18 enhanced through technological innovations and point-of-care devices which may improve  
19 both geographical and financial accessibility, especially thanks to reduced indirect costs  
20 related to transport [23], [24]. To reach this goal, national health authorities should rely on  
21 WHO guidelines on hepatitis B and C testing which propose simplified algorithms which are  
22 easy to implement [8] as well on recent WHO recommendations for the screening, care and  
23 treatment of chronic hepatitis B and C infections [25], [26].

24  
25  
26  
27  
28  
29  
30  
31  
32  
33  
34  
35  
36  
37  
38  
39  
40  
41  
42  
43  
44  
45  
46  
47  
48  
49  
50  
51  
52  
53  
54  
55  
56  
57  
58  
59  
60

Lessons from HIV should also be drawn to improve access to treatment, especially by using low-cost generic drugs and promoting subsidized treatment. While HBV treatment is currently relatively financially accessible, costing between 5.10 to 6.80 euros per month, we recommend free access for mono-HBV patients, as user fees reduce adherence and treatment



1  
2  
3 effectiveness, something already demonstrated for HIV [27], [28]. With respect to HCV  
4  
5 treatment, the large decrease in prices obtained recently for DAA with the arrival of generic  
6  
7 drugs has led to those treatments becoming very cost-effective in Cameroon [29]. However, at  
8  
9 current prices (approximately 580-600 euros for a 12-week Sofosbuvir-based regimen)[30],  
10  
11 they will remain inaccessible for the large majority of the population if they are not  
12  
13 subsidized.  
14  
15

16  
17 This study has limitations. It was only conducted in Yaoundé and thus may not reflect  
18  
19 what happens elsewhere in Cameroon, especially in rural areas. However, we can hypothesize  
20  
21 that challenges to care access are even more severe there, as most specialists including  
22  
23 gastroenterologists are located in Yaoundé and in Douala. In addition, the study took place in  
24  
25 2014 before the 2016 announcement by the Cameroonian ministry of Health about the  
26  
27 availability of DAA [31]. Since then, DAA costs have substantially decreased. However, as  
28  
29 previously seen, challenges related to access to pre-therapeutic tests and to treatment are still  
30  
31 relevant today given that current treatment prices are still far above the financial capacity of  
32  
33 the population.  
34  
35  
36  
37  
38  
39

40 **Conclusion.** Free or reasonably-priced access to hepatitis B and C treatments in Cameroon  
41  
42 can only be effective and efficient at reducing the hepatitis disease burden, if the screening  
43  
44 algorithm and the whole package of pre-therapeutic check-up are i) simplified and  
45  
46 standardized in accordance with WHO guidelines [25], [26], ii) subsidized by national  
47  
48 comprehensive policies orientated towards universal health care. Our results are in line with  
49  
50 the Sustainable Development Goals.  
51  
52  
53  
54  
55

#### 56 **Contributors**

57  
58 FC, DNN, PET participated in the collection of data. FC and SB were responsible for data analysis  
59  
60 and interpretation of results and FC wrote the first draft of the manuscript. SB, PC, DNN, CK and LV

1  
2  
3 contributed to reviewing the manuscript. SB, LV and CK were involved in the design and  
4  
5 implementation of the ANRS EVOLCam survey. CK and LV were the principal investigators of the  
6  
7 survey. All authors approved the final version of the manuscript. All authors had full access to all of  
8  
9 the data in the study and take responsibility for the integrity of this data, as well as the accuracy of the  
10  
11 data analysis.  
12  
13

### 14 15 **Funding**

16  
17 This study was financially supported by the French National Agency for Research on AIDS and viral  
18  
19 hepatitis (ANRS), and a postdoctoral grant from Sidaction and the study was approved by the  
20  
21 Cameroonian Ministry of Public Health.  
22  
23

### 24 25 **Competing interests**

26  
27 None declared.  
28  
29

### 30 31 **Ethics approval**

32  
33 The Ethics Review Board of the Ministry of Public Health of Cameroon granted ethical approval for  
34  
35 this study. Patients and health professionals gave informed consent prior to interviews and  
36  
37 observations.  
38  
39

### 40 41 **Data sharing statement**

42  
43 No additional data available.  
44  
45

### 46 47 **Acknowledgements**

48  
49 We thank all patients and HCP from several hospitals in Yaoundé who agreed to participate in the study.

50  
51 We also thank Jude Sweeney for revising and editing the English version of the manuscript.  
52  
53

54  
55 \*The EVOLCAM study group: C. Kuaban, L. Vidal (principal investigators); G. Maradan, A. Ambani, O. Ndalle,  
56  
57 P. Momo, C. Tong (field coordination team); S. Boyer, V. Boyer, L. March, M. Mora, L. Sagaon Teyssier, M. de  
58  
59 Sèze, B. Spire, M. Suzan Monti (UMR912 – SESTIM); C. Laurent, F. Liégeois, E. Delaporte, V. Boyer, S. Eymard  
60  
Duvornay (TransVIHMI); F. Chabrol, E. Kouakam, O. Ossanga, H. Essama Owona, C. Biloa, M.T. Mengue  
(UCAC); E. Mpoudi Ngolé (CREMER); P.J. Fouda, C. Kouanfack, H. Abessolo, N. Noumssi, M. Defo, H. Meli  
(Hôpital Central, Yaoundé); Z. Nanga, Y. Perfura, M.Ngo Tonye, O. Kouambo, U. Olinga, E Soh (Hôpital Jamot,  
Yaoundé); C. Ejangue, E. Njom Nlend, A. Simo Ndongo (Hôpital de la Caisse, Yaoundé); E Abeng Mbozo'o, M.

Mpoudi Ngole, N. Manga, C. Danwe, L. Ayangma, B. Taman (Hôpital Militaire, Yaoundé); E.C. Njitoyap Ndam, B. Fangam Molu, J. Meli, H. Hadja, J. Lindou (Hôpital Général, Yaoundé); J.M. Bob Oyono, S. Beke, (Hôpital Djoungolo, Yaoundé); D. Eloundou, G. Touko, (District Hospital, Sa'a); J.J. Ze, M. Fokoua, L. Ngum, C. Ewolo, C. Bondze (District Hospital, Obala); J.D. Ngan Bilong, D. S. Maninzou, A. Nono Toche (Hôpital St Luc, Mbalmayo); M. Tsoungi Akoa, P. Ateba, S. Abia (District Hospital, Mbalmayo); A. Gutierrez, R. Garcia, P. Thumerel (Catholic Health Centre, Bikop); E. Belley Priso, Y. Mapoure, A. Malongue, A.P. Meledie Ndjong, B. Mbatchou, J. Hachu, S. Ngwane (Hôpital Général, Douala); J. Dissongo, M. Mbangue, Ida Penda, H. Mossi, G. Tchatchoua, Yoyo Ngongang, C. Nouboue, I. Wandji, L. Ndalle, J. Djene (Hôpital Laquintinie, Douala); M.J. Gomez, A. Mafuta, M. Mgantcha (Catholic Hospital St Albert Legrand, Douala); E.H. Moby, M.C. Kuitcheu, A.L. Mawe, Ngam Engonwei (District Hospital, Bonassama); L.J. Bitang, M. Ndam, R.B. Pallawo, Issiakou Adamou, G. Temgoua (District Hospital, Deido); C. Ndjie Essaga, C. Tchimou, A. Yeffou, I. Ngo, H. Fokam, H. Nyemb (District Hospital, Nylon); L.R. Njock, S. Omgnesseck, E. Kamto, B. Takou (District Hospital, Edea); L.J.G Buffeteau, F. Ndoumbe, JD Noah, I. Seyep (Hôpital St Jean de Malte, Njombe).

## References

- [1] WHO. Global Hepatitis Report 2017  
<https://www.who.int/hepatitis/publications/global-hepatitis-report2017/en/>
- [2] Schweitzer A, Horn J, Mikolajczyk RT *et al.* Estimations of worldwide prevalence of chronic hepatitis B virus infection: a systematic review of data published between 1965 and 2013. *Lancet* 2016;386, 10003: 1546-1555.
- [3] Riou J, Aït Ahmed M, Blake M *et al.* Hepatitis C virus seroprevalence in adults in Africa: a systematic review and meta-analysis *J Viral Hepat* 2016; 23: 244-255.
- [4] Lemoine M, Eholié S, Lacombe K. Reducing the neglected burden of viral hepatitis in Africa: strategies for a global approach. *Journal of hepatology* 2015; 62:469-476.
- [5] Pépin P, Labbé C, Noble goals, unforeseen consequences: control of tropical diseases in colonial Central Africa and the iatrogenic transmission of blood-borne viruses. *Trop. Med. Int. Health* 2008;13:744-753.
- [6] Lemoine L, Thursz MR, Battlefield against hepatitis B infection and HCC in Africa. *Journal of Hepatology* 2017;66 :645-654.
- [7] Breakwell L, Tevi-Benissan C, Childs L, *et al.* The status of hepatitis B control in the African region. *Pan Afr Med J* 2017;27:S3.
- [8] WHO. Guidelines on hepatitis B and C testing. 2017  
<https://www.who.int/hepatitis/publications/guidelines-hepatitis-c-b-testing/en/>
- [9] Appel de Dakar. Conférence internationale des acteurs de lutte contre les hépatites en Afrique francophone. 27 July 2011 <http://documents.irevues.inist.fr/handle/2042/45045>
- [10] Chabrol F, David PM, Krikorian G. Rationing hepatitis C treatment in the context of austerity policies in France and Cameroon: A transnational perspective on the pharmaceuticalization of healthcare systems. *Soc. Sci. Med.* 2017;187:243-250.
- [11] Pourette D, Enel C. Représentations et vécu de l'hépatite B de patients subsahariens en Côte d'Ivoire et en France. *Sante Publique* 2015;26,6:869-878.
- [12] Giles-Vernick T, Hejoaka F, Sanou A, *et al.* Barriers to Linkage to Care for Hepatitis B Virus Infection: A Qualitative Analysis in Burkina Faso, West Africa. *Am J Trop Med Hyg* 2016; 95,6: 1368-1375.
- [13] World Bank. World Bank Open Data 2018 <https://data.worldbank.org/>
- [14] UNDP. Human Development Reports. Cameroon profile 2018  
<http://hdr.undp.org/en/countries/profiles/CMR>
- [15] WHO. World Health Statistics 2015  
[https://www.who.int/gho/publications/world\\_health\\_statistics/2015/en/](https://www.who.int/gho/publications/world_health_statistics/2015/en/)

- 1  
2  
3 [16] Bigna JJ, Amougou MA, Asangbeh SL, *et al.* Seroprevalence of hepatitis C virus  
4 infection in Cameroon: a systematic review and meta-analysis. *BMJ Open* 2017;7,8:e015748.  
5 [17] Njouom R, Nerrienet E, Dubois M, *et al.* The hepatitis C virus epidemic in Cameroon:  
6 genetic evidence for rapid transmission between 1920 and 1960. *Infect Genet Evol*  
7 2007;7,3:361-367.  
8 [18] Tong M, Suzan-Monti M, Sagaon-Teyssier L, *et al.*, Treatment interruption in HIV-  
9 positive patients followed up in Cameroon's antiretroviral treatment programme: individual  
10 and health care supply-related factors (ANRS-12288 EVOLCam survey), *Trop. Med. Int.*  
11 *Health* 2018;23,3:315-326.  
12 [19] Foley G, Timonen V, Using Grounded Theory Method to Capture and Analyze Health  
13 Care Experiences. *Health Serv Res* 2015;50,4:1195-1210.  
14 [20] WHO. The world health report 2000 - Health systems: improving performance 1999  
15 <https://www.who.int/whr/2000/en/>  
16 [21] Xu K, Evans DB, Kawabata K, Zeramdini R, *et al.* Household catastrophic health  
17 expenditure: a multicountry analysis. *The Lancet* 2003;362:9378:111-117.  
18 [22] Subic M, Zoulim F, How to improve access to therapy in hepatitis B patients. *Liver*  
19 *International* 2018;38:S1:115-121  
20 [23] Peeling RW, Boeras DI, Marinucci F, *et al.* The future of viral hepatitis testing:  
21 innovations in testing technologies and approaches. *BMC Infectious Diseases* 2017;17:699.  
22 [24] Duchesne L, Lacombe K, Innovative technologies for point-of-care testing of viral  
23 hepatitis in low-resource and decentralized settings. *J. Viral Hepat.* 2018;25:108-117.  
24 [25] WHO. Guidelines for the prevention, care and treatment of persons with chronic  
25 hepatitis B infection. 2017 [http://www.who.int/hepatitis/publications/hepatitis-b-](http://www.who.int/hepatitis/publications/hepatitis-b-guidelines/en/)  
26 [guidelines/en/](http://www.who.int/hepatitis/publications/hepatitis-b-guidelines/en/)  
27 [26] WHO. Guidelines for the care and treatment of persons diagnosed with chronic  
28 hepatitis C virus infection. 2018 [https://www.who.int/hepatitis/publications/hepatitis-c-](https://www.who.int/hepatitis/publications/hepatitis-c-guidelines-2018/en/)  
29 [guidelines-2018/en/](https://www.who.int/hepatitis/publications/hepatitis-c-guidelines-2018/en/)  
30 [27] Boyer S, Marcellin F, Ongolo-Zoglo P, *et al.* Financial barriers to HIV treatment in  
31 Yaoundé, Cameroon: first results of a national cross-sectional survey. *Bull World Health*  
32 *Organ* 2009;87:279-287.  
33 [28] Mills EJ, Nachega JB, Bangsberg DR, *et al.* Adherence to HAART: a systematic  
34 review of developed and developing nation patient-reported barriers and facilitators. *PLoS*  
35 *medicine* 2006;3:e438.  
36 [29] Boyer S, Cost-effectiveness of Sofosbuvir-Based Hepatitis C regimens in Central and  
37 West Africa (ANRS 12342). Oral presentation EASL conference 2018.  
38 [30] WHO. Progress report on access to hepatitis C treatment. 2018.  
39 [31] Tietcheu Galani BR, Njouom R, Moundipa F, Hepatitis C in Cameroon: What is the  
40 progress from 2001 to 2016? *J Transl Int Med* 2016; 4:162-169.  
41  
42  
43  
44  
45  
46  
47  
48  
49  
50  
51  
52  
53  
54  
55  
56  
57  
58  
59  
60

## Tables

**Table 1. Prices of available for HBV and HCV screening and pre-therapeutic tests and treatment in 2014 in Yaoundé, Cameroon**

| Tests or treatment                                      | Unit Price (in euros) | Source                                   |
|---------------------------------------------------------|-----------------------|------------------------------------------|
| <b>Hepatitis B</b>                                      |                       |                                          |
| <i>Screening and pre-therapeutic assessment</i>         |                       |                                          |
| HBs Antigene*                                           | 13.9                  | Centre Pasteur Yaoundé (CPC)             |
| Anti HBc antibodies*                                    | 13.9                  | CPC                                      |
| Anti HBs antibodies*                                    | 13.9                  | CPC                                      |
| HBe Antigene*                                           | 13.9                  | CPC                                      |
| Ag HBe antibodies*                                      | 13.9                  | CPC                                      |
| Transaminases AST/ALT*                                  | 10.3                  | CPC                                      |
| Num NFS*                                                | 5.9                   | CPC                                      |
| Albumin*                                                | 5.5                   | CPC                                      |
| Biliburin*                                              | 3.0                   | CPC                                      |
| DNA hepatitis B (PCR) viral load*                       | 69.4                  | CPC                                      |
| Gamma-GT (glutamyl-transpeptidases)*                    | 3.2                   | CPC                                      |
| HIV serology*                                           | 13.9                  | CPC                                      |
| Hepatitis delta*                                        | 29.7                  | CPC                                      |
| Hepatic ultrasound*                                     | 12.2                  | Hospital 1                               |
| Fibrotest (not systematically prescribed)               | 135.7                 | CPC                                      |
| Electrophoresis protein (not systematically prescribed) | 83                    | CPC                                      |
| <b>TOTAL</b>                                            | <b>222.6 - 441.3</b>  |                                          |
| <b>Treatment</b>                                        |                       |                                          |
| Tenofovir 300 mg 30cp (monthly treatment)               | 6.8                   | Pharmacy of Hospital 2 (study data)      |
| Lamivudine 300 mg 30cp (monthly treatment)              | 5.1                   | Pharmacy of Hospital 2 (study data)      |
| <b>Hepatitis C</b>                                      |                       |                                          |
| <i>Screening and pre-therapeutic assessment</i>         |                       |                                          |
| Anti HCV antibodies*                                    | 13.9                  | Centre Pasteur Yaoundé                   |
| Transaminases AST/ALT*                                  | 10.3                  | CPC                                      |
| Num NFS*                                                | 5.9                   | CPC                                      |
| Viral load HCV*                                         | 69.3                  | CPC                                      |
| Gamma-GT (glutamyl-transpeptidases)*                    | 3.2                   | CPC                                      |
| Biliburin*                                              | 3.0                   | CPC                                      |
| Albumin*                                                | 5.5                   | CPC                                      |
| Genotyping (not systematically prescribed)              | 137                   | CPC                                      |
| Hepatic ultrasonound*                                   | 12.2                  | Hospital 1                               |
| Electrophoresis protein (not systematically prescribed) | 83                    | CPC                                      |
| Creatinine*                                             | 2.0                   | CPC                                      |
| <b>TOTAL</b>                                            | <b>125 - 345</b>      |                                          |
| <b>Treatment</b>                                        |                       |                                          |
| <i>Interferon-based treatments</i>                      |                       | <i>Roche Access program (study data)</i> |
| One injection (-30%)                                    | 155                   | Roche Access program (study data)        |
| One injection (-50%)                                    | 86                    | Roche Access program (study data)        |
| Full treatment 48 weeks                                 | 7,500                 | Roche Access program (study data)        |
| Full treatment 72 weeks                                 | 11,200                | Roche Access program (study data)        |

**Table 2. Information on institutional stakeholders and healthcare professionals who participated in the study's semi-structured interviews (N=28)**

|                                   | Position                       | Institution                    | City    |
|-----------------------------------|--------------------------------|--------------------------------|---------|
| <b>Institutional stakeholders</b> |                                |                                |         |
| I1                                | Physician (gastroenterologist) | Ministry of Health             | Yaoundé |
| I2                                | Public health officer          | Ministry of Health             | Yaoundé |
| I3                                | Hepatitis Programme Officer    | International Organization     | Geneva  |
| I4                                | Infectious Disease Researcher  | Public Health Research         | Yaoundé |
| I5                                | Virologist                     | Public Health Research         | Yaoundé |
| I6                                | Programme leader               | International NGO              | Yaoundé |
| I7                                | Association leader             | National NGO                   | Yaoundé |
| I8                                | Association leader             | International NGO              | Paris   |
| I9                                | Programme leader               | International NGO              | Paris   |
| I10                               | Programme manager              | International NGO              | Paris   |
| I11                               | Physician/ researcher          | International NGO              | Geneva  |
| I12                               | Communications leader          | International NGO              | Paris   |
| I13                               | Sales Representative           | Other (Pharmaceutical company) | Yaoundé |
| I14                               | Head of Publication            | Other (National Press)         | Yaoundé |
| <b>Healthcare professionals</b>   |                                |                                |         |
| H1                                | Nurse                          | Public Hospital-1              | Yaoundé |
| H2                                | Head Nurse                     | Public Hospital-1              | Yaoundé |
| H3                                | Physician (gastroenterologist) | Public Hospital-1              | Yaoundé |
| H4                                | Physician (gastroenterologist) | Public Hospital-1              | Yaoundé |
| H5                                | Physician (gastroenterologist) | Private clinic                 | Yaoundé |
| H6                                | Physician (gastroenterologist) | Public Hospital- 2             | Yaoundé |
| H7                                | Physician (gastroenterologist) | Public Hospital -3             | Yaoundé |
| H8                                | Physician (gastroenterologist) | Public Hospital -3             | Yaoundé |
| H9                                | Physician (infectious disease) | Public Hospital- 1             | Yaoundé |
| H10                               | Physician (infectious disease) | Public Hospital-2              | Yaoundé |
| H11                               | Physician (infectious disease) | Public Hospital-2              | Yaoundé |
| H12                               | General Practitioner           | Public District Hospital       | Obala   |
| H13                               | Haematologist                  | Public Hospital -3             | Yaoundé |
| H14                               | Social worker                  | Public hospital-1              | Yaoundé |

**Table 3. Information on patients who participated in the study's semi-structured interviews (N=12)**

| No  | S | Age range | Status  | Circumstances of screening  | Hospital | Living area | On treatment      |
|-----|---|-----------|---------|-----------------------------|----------|-------------|-------------------|
| P1  | M | 20-25     | HBV     | Blood donation              | H1       | Douala      | None              |
| P2  | M | 30-35     | HBV     | Symptoms                    | H1       | Yaoundé     | None              |
| P3  | F | 20-25     | HBV     | Antenatal care              | H1       | Yaoundé     | None              |
| P4  | F | 25-30     | HBV     | Blood donation              | H1       | Obala       | None              |
| P5  | F | 25-30     | HBV     | Antenatal care              | H1       | Yaoundé     | None              |
| P6  | F | 35-40     | HIV/HBV | Symptoms                    | H2       | Yaoundé     | HAART (Tenofovir) |
| P7  | M | 35-40     | HIV/HBV | Follow-up for HIV infection | H1       | Yaoundé     | HAART (Tenofovir) |
| P8  | F | 35-40     | HIV/HBV | Follow-up for HIV infection | H1       | Yaoundé     | HAART (Tenofovir) |
| P9  | F | 55-60     | HCV     | Check-up                    | H1       | Yaoundé     | None              |
| P10 | F | 35-40     | HIV/HCV | Follow-up for HIV infection | H1       | Adamaoua    | HAART             |
| P11 | F | 65-70     | HIV/HCV | Follow-up for HIV infection | H2       | Yaoundé     | HAART             |
| P12 | F | 55-60     | HIV/HCV | Follow-up for HIV infection | H1       | Yaoundé     | HAART             |

M=Male; F=Female; HAART= Highly Active Antiretroviral Treatment; H1= Hôpital central de Yaoundé; H2=Hôpital Général de Yaoundé

## Standards for Reporting Qualitative Research (SRQR)\*

<http://www.equator-network.org/reporting-guidelines/srqr/>

Page/line no(s).

### Title and abstract

|                                                                                                                                                                                                                                                              |               |
|--------------------------------------------------------------------------------------------------------------------------------------------------------------------------------------------------------------------------------------------------------------|---------------|
| <p><b>Title</b> - Concise description of the nature and topic of the study Identifying the study as qualitative or indicating the approach (e.g., ethnography, grounded theory) or data collection methods (e.g., interview, focus group) is recommended</p> | <p>page 1</p> |
| <p><b>Abstract</b> - Summary of key elements of the study using the abstract format of the intended publication; typically includes background, purpose, methods, results, and conclusions</p>                                                               | <p>page 2</p> |

### Introduction

|                                                                                                                                                                     |                                                   |
|---------------------------------------------------------------------------------------------------------------------------------------------------------------------|---------------------------------------------------|
| <p><b>Problem formulation</b> - Description and significance of the problem/phenomenon studied; review of relevant theory and empirical work; problem statement</p> | <p>page 3; last § and page 4 2<sup>nd</sup> §</p> |
| <p><b>Purpose or research question</b> - Purpose of the study and specific objectives or questions</p>                                                              | <p>page 2, 2<sup>nd</sup> §</p>                   |

### Methods

|                                                                                                                                                                                                                                                                                                                                                                                                             |                       |
|-------------------------------------------------------------------------------------------------------------------------------------------------------------------------------------------------------------------------------------------------------------------------------------------------------------------------------------------------------------------------------------------------------------|-----------------------|
| <p><b>Qualitative approach and research paradigm</b> - Qualitative approach (e.g., ethnography, grounded theory, case study, phenomenology, narrative research) and guiding theory if appropriate; identifying the research paradigm (e.g., postpositivist, constructivist/ interpretivist) is also recommended; rationale**</p>                                                                            | <p>page 8</p>         |
| <p><b>Researcher characteristics and reflexivity</b> - Researchers' characteristics that may influence the research, including personal attributes, qualifications/experience, relationship with participants, assumptions, and/or presuppositions; potential or actual interaction between researchers' characteristics and the research questions, approach, methods, results, and/or transferability</p> | <p>page 6</p>         |
| <p><b>Context</b> - Setting/site and salient contextual factors; rationale**</p>                                                                                                                                                                                                                                                                                                                            | <p>pages 4-5</p>      |
| <p><b>Sampling strategy</b> - How and why research participants, documents, or events were selected; criteria for deciding when no further sampling was necessary (e.g., sampling saturation); rationale**</p>                                                                                                                                                                                              | <p>page 7</p>         |
| <p><b>Ethical issues pertaining to human subjects</b> - Documentation of approval by an appropriate ethics review board and participant consent, or explanation for lack thereof; other confidentiality and data security issues</p>                                                                                                                                                                        | <p>page 7</p>         |
| <p><b>Data collection methods</b> - Types of data collected; details of data collection procedures including (as appropriate) start and stop dates of data collection and analysis, iterative process, triangulation of sources/methods, and modification of procedures in response to evolving study findings; rationale**</p>                                                                             | <p>page 6, last §</p> |

|                       |                                                                                                                                                                                                                                                       |        |
|-----------------------|-------------------------------------------------------------------------------------------------------------------------------------------------------------------------------------------------------------------------------------------------------|--------|
| 1<br>2<br>3<br>4<br>5 | <b>Data collection instruments and technologies</b> - Description of instruments (e.g., interview guides, questionnaires) and devices (e.g., audio recorders) used for data collection; if/how the instrument(s) changed over the course of the study | page 7 |
| 6<br>7<br>8           | <b>Units of study</b> - Number and relevant characteristics of participants, documents, or events included in the study; level of participation (could be reported in results)                                                                        | page 9 |
| 9<br>10<br>11<br>12   | <b>Data processing</b> - Methods for processing data prior to and during analysis, including transcription, data entry, data management and security, verification of data integrity, data coding, and anonymization/de-identification of excerpts    | page 8 |
| 13<br>14<br>15<br>16  | <b>Data analysis</b> - Process by which inferences, themes, etc., were identified and developed, including the researchers involved in data analysis; usually references a specific paradigm or approach; rationale**                                 | page 8 |
| 17<br>18<br>19<br>20  | <b>Techniques to enhance trustworthiness</b> - Techniques to enhance trustworthiness and credibility of data analysis (e.g., member checking, audit trail, triangulation); rationale**                                                                | page 8 |

## Results/findings

|                      |                                                                                                                                                                                                   |                    |
|----------------------|---------------------------------------------------------------------------------------------------------------------------------------------------------------------------------------------------|--------------------|
| 23<br>24<br>25<br>26 | <b>Synthesis and interpretation</b> - Main findings (e.g., interpretations, inferences, and themes); might include development of a theory or model, or integration with prior research or theory | page 10 to page 16 |
| 27<br>28<br>29       | <b>Links to empirical data</b> - Evidence (e.g., quotes, field notes, text excerpts, photographs) to substantiate analytic findings                                                               | page 10 to page 16 |

## Discussion

|                                        |                                                                                                                                                                                                                                                                                                                                                                                                             |                  |
|----------------------------------------|-------------------------------------------------------------------------------------------------------------------------------------------------------------------------------------------------------------------------------------------------------------------------------------------------------------------------------------------------------------------------------------------------------------|------------------|
| 32<br>33<br>34<br>35<br>36<br>37<br>38 | <b>Integration with prior work, implications, transferability, and contribution(s) to the field</b> - Short summary of main findings; explanation of how findings and conclusions connect to, support, elaborate on, or challenge conclusions of earlier scholarship; discussion of scope of application/generalizability; identification of unique contribution(s) to scholarship in a discipline or field | page 18          |
| 39                                     | <b>Limitations</b> - Trustworthiness and limitations of findings                                                                                                                                                                                                                                                                                                                                            | page 19, first § |

## Other

|                |                                                                                                                                               |         |
|----------------|-----------------------------------------------------------------------------------------------------------------------------------------------|---------|
| 42<br>43<br>44 | <b>Conflicts of interest</b> - Potential sources of influence or perceived influence on study conduct and conclusions; how these were managed | page 20 |
| 45<br>46       | <b>Funding</b> - Sources of funding and other support; role of funders in data collection, interpretation, and reporting                      | page 20 |

\*The authors created the SRQR by searching the literature to identify guidelines, reporting standards, and critical appraisal criteria for qualitative research; reviewing the reference lists of retrieved sources; and contacting experts to gain feedback. The SRQR aims to improve the transparency of all aspects of qualitative research by providing clear standards for reporting qualitative research.



1  
2  
3  
4  
5  
6  
7  
8  
9  
10  
11  
12  
13  
14  
15  
16  
17  
18  
19  
20  
21  
22  
23  
24  
25  
26  
27  
28  
29  
30  
31  
32  
33  
34  
35  
36  
37  
38  
39  
40  
41  
42  
43  
44  
45  
46  
47  
48  
49  
50  
51  
52  
53  
54  
55  
56  
57  
58  
59  
60

\*\*The rationale should briefly discuss the justification for choosing that theory, approach, method, or technique rather than other options available, the assumptions and limitations implicit in those choices, and how those choices influence study conclusions and transferability. As appropriate, the rationale for several items might be discussed together.

**Reference:**

O'Brien BC, Harris IB, Beckman TJ, Reed DA, Cook DA. **Standards for reporting qualitative research: a synthesis of recommendations.** *Academic Medicine*, Vol. 89, No. 9 / Sept 2014  
DOI: 10.1097/ACM.0000000000000388

For peer review only
